# 1 **Niche signals regulate continuous transcriptional states in** 2 **hematopoietic stem cells**

3

4 Eva M Fast<sup>1,2,3</sup>, Audrey Sporrij<sup>1,2,3</sup>, Margot Manning<sup>1,2,3</sup>, Edroaldo Lummertz da Rocha<sup>2,3</sup>, Song  
5 Yang<sup>2,3</sup>, Yi Zhou<sup>2,3</sup>, Jimin Guo<sup>1,3,4,5</sup>, Ninib Baryawno<sup>1,3,5,6</sup>, Nikolaos Barkas<sup>7</sup>, David T  
6 Scadden<sup>1,3,5</sup>, Fernando Camargo<sup>1,2,3</sup>, Leonard I Zon<sup>1,2,3,8,#</sup>

7

8

9 1. Department of Stem Cell and Regenerative Biology, Harvard University, Cambridge, MA,  
10 USA

11 2. Stem Cell Program and Division of Hematology/Oncology, Boston Children's Hospital,  
12 Boston, MA, USA

13 3. Harvard Stem Cell Institute, Harvard University, Cambridge, MA, USA

14 4. Medical Devices Research Centre, National Research Council Canada, Boucherville, QC,  
15 Canada

16 5. Center for Regenerative Medicine, Massachusetts General Hospital, Boston, MA, USA

17 6. Childhood Cancer Research unit, Dep. Of Children's and Women's Health, Karolinska  
18 Institutet, Karolinska University Hospital, Stockholm, Sweden

19 7. Broad Institute of Harvard and MIT, Cambridge, MA USA

20 8. Howard Hughes Medical Institute, Boston, MA, USA

21

22

23 # Correspondence to: Leonard I. Zon, [leonard.zon@enders.tch.harvard.edu](mailto:leonard.zon@enders.tch.harvard.edu)

24

## 25 **Abstract**

26 Hematopoietic stem cells (HSCs) must ensure adequate blood cell production following distinct  
27 external stressors. A comprehensive understanding of *in vivo* heterogeneity and specificity of  
28 HSC responses to external stimuli is currently lacking. We performed single-cell RNA  
29 sequencing (scRNA-Seq) on functionally validated mouse HSCs and LSK (Lin-, c-Kit+, Sca1+)  
30 progenitors after *in vivo* perturbation of niche signals interferon, granulocyte-colony stimulating  
31 factor (G-CSF), and prostaglandin. We identified six HSC states that are characterized by  
32 enrichment but not exclusive expression of marker genes. Niche perturbations induce novel and  
33 rapid transitions between these HSC states. Differential expression analysis within each state  
34 revealed HSC- and LSK-specific molecular signatures for each perturbation. Chromatin analysis  
35 of unperturbed HSCs and LSKs by scATAC-Seq revealed HSC-specific, cell intrinsic  
36 predispositions to niche signals. We compiled a comprehensive resource of HSC- and  
37 progenitor-specific chromatin and transcriptional features that represent important determinants  
38 of regenerative potential during stress hematopoiesis.

39

## 40 **Introduction**

41 Stem cell therapy holds promises for numerous indications, including blood diseases,  
42 autoimmune diseases, neurodegeneration and cancer (Blau and Daley, 2019). Despite being  
43 used in the clinic for over 30 years, HSC transplants remain a highly risky procedure. To better  
44 understand HSC regeneration, recent efforts have used scRNA-Seq to discover novel markers  
45 to further enrich for functional HSCs (Chen et al., 2016, Cabezas-Wallscheid et al., 2017,  
46 Wilson et al., 2015, Rodriguez-Fraticelli et al., 2020). Yet no consensus exists on the optimal  
47 marker combination to obtain the most purified HSCs in part because extensive functional  
48 heterogeneity within HSCs makes experimental evaluation challenging (Haas et al., 2018). Both  
49 intrinsic and extrinsic factors have been implicated in regulating HSC function (Zon, 2008,  
50 Morrison et al., 1996). The stem cell niche forms an important extrinsic regulator of HSCs as it  
51 anchors stem cells and maintains the balance between self-renewal and differentiation  
52 (Morrison and Spradling, 2008, Morrison and Scadden, 2014). Release of soluble signals from  
53 the niche such as interferons, prostaglandins, and growth factors, including SCF and G-CSF,  
54 have been shown to influence HSC function during homeostasis and upon injury (Pinho and  
55 Frenette, 2019, Pietras et al., 2016, Zhao et al., 2014, Morales-Mantilla and King, 2018). While  
56 known to be affected by a wide variety of extracellular signals, little is known about the  
57 heterogeneity and specificity of HSC responses to these external stimuli, nor is it understood

58 how differential responses relate to functional diversity of HSCs. HSCs are also regulated cell  
59 intrinsically (Zon, 2008, Morrison et al., 1996). Chromatin state is a crucial determinant of cell  
60 identity and behavior (Klemm et al., 2019). Hematopoietic differentiation is a prime example of  
61 how cell fate changes associate with massive remodeling of the epigenetic landscape  
62 (Avgustinova and Benitah, 2016). Despite the current knowledge on regulators of HSC fate, few  
63 studies have assessed chromatin states in purified, *in vivo* derived HSC populations (Yu et al.,  
64 2017, Lara-Astiaso et al., 2014) due to technical limitations such as cell numbers. Recent  
65 advancements in single cell chromatin accessibility sequencing (scATAC-Seq) provides a  
66 methodological framework for studying the diversity and uniqueness of HSC chromatin features  
67 at homeostasis and upon external stimulation (Buenrostro et al., 2018, Lareau et al., 2019).  
68 Here, we performed comprehensive scRNA-Seq and scATAC-Seq profiling on functionally  
69 validated mouse HSCs and examined *in vivo* transcriptional responses to extracellular  
70 stimulation, mimicking signals from the stem cell niche. We found that unperturbed HSCs exist  
71 in distinct transcriptional states. Niche signals can alter the cell distribution between HSC states  
72 to varying degrees depending on the stimulant as well as induce specific changes within cell  
73 states. Comparison of HSCs to multipotent LSK (Lin<sup>-</sup>, c-Kit<sup>+</sup>, Sca1<sup>+</sup>) progenitors allowed us to  
74 determine the specificity of transcriptional responses in HSCs. Finally, analysis of native HSC  
75 chromatin states revealed cell intrinsic heterogeneity that may prime HSC subpopulations for  
76 particular transcriptional responses following exposure to certain signals. The data is provided  
77 as a resource to the broader research community via an easily accessible web interactive  
78 application (<https://mouse-hsc.cells.ucsc.edu>). Overall, this work provides the first  
79 comprehensive description of the single cell transcriptomic and epigenetic landscape of HSCs  
80 and multipotent LSK progenitors *in vivo*.

81

## 82 **Results**

83

### 84 ***In vivo* stimulation of functionally validated HSCs and multipotent progenitors (MPPs) for** 85 **transcriptomic and epigenetic profiling**

86 To investigate transcriptional responses to external signals, we profiled HSCs after four distinct  
87 *in vivo* niche perturbations (Fig 1A). Male and female mice were treated with one of three  
88 activators, 16,16-dimethyl Prostaglandin E<sub>2</sub> (dmPGE<sub>2</sub>), Poly(I:C), or G-CSF for two hours or  
89 administered the Cox1/2 inhibitor Indomethacin (here abbreviated to 'Indo') for one week to  
90 deplete endogenous prostaglandins (see Methods). After the respective drug treatments, HSC  
91 and MPP populations comprising the entire LSK compartment were isolated via FACS (Sup Fig

92 1A). Through limit dilutions transplantation assay (LDTA) and ELDA analysis (Hu and Smyth,  
93 2009), we determined HSC purity to be 1 in 8 (Sup Fig 1B-1D). This confirmed that our isolation  
94 and purification procedure allows for the profiling of functional, highly purified HSCs. Cell cycle  
95 analysis further verified that HSCs were mostly quiescent, in contrast to other MPP populations  
96 (Sup Fig 1E)(Cabezas-Wallscheid et al., 2014). Phenotypic marker composition within LSK cells  
97 remained largely consistent between different stimulations (Sup Fig 1F). An exception was the  
98 reduction of cells within the HSC compartment following dmPGE<sub>2</sub> treatment, decreasing from  
99 1.9% in control to 0.85% of LSK cells (p-value =  $6.4 \times 10^{-4}$ , by differential proportion analysis  
100 (DPA)(Farbehi et al., 2019)). To account for a potential phenotypic shift in HSC surface marker  
101 expression due to CD34 externalization, which would move functional HSCs to the MPP1  
102 population, we compared the contribution of the later by scRNA-Seq defined 'stem cell state' in  
103 HSCs and MPP1s. We found no increase in the 'stem cell' population in dmPGE<sub>2</sub> treated  
104 MPP1s, compared to the control (Sup Fig 2G). After cell sorting, we subjected a total of 46,344  
105 cells to scRNA-Seq using the 10x Genomics platform (see Methods). We obtained an average  
106 of 37,121 (SD = 14,308) reads per cell and 2,994 (SD = 480) genes per cell (Sup Table 1),  
107 indicative of a rich dataset that contained functionally validated HSCs.

108

### 109 **Niche signals induce rapid transitions between transcriptional HSC states**

110 To determine how niche stimulants affect HSCs, we analyzed a combination of control and  
111 treated cells. We applied a standard scRNA-Seq pipeline to filter and normalize UMI reads (see  
112 Methods). Separate analysis of male and female HSCs revealed little sexual dimorphism during  
113 both steady state and following activation (Sup Fig 3, Sup Table 2 and 3). We therefore  
114 regressed out any sex specific effects from further downstream analyses (see Methods). In the  
115 aggregated dataset, we detected a total of six clusters (Fig 1B). To ensure optimal choice of  
116 clustering hyper parameters, we used a data driven approach (Silhouette Coefficient and  
117 Davies–Bouldin index) that was validated by comparison of two independent biological scRNA-  
118 Seq replicates of control HSCs sorted from different mouse strains (see Methods, Sup Fig 2A-  
119 2D, Sup Table 4). The absence of clear separation into highly distinct clusters in UMAP space  
120 (Fig 1B), together with fact that most marker genes were not exclusively expressed but rather  
121 enriched in a given cluster (Fig 1C), suggests that the HSC clusters represent transcriptional  
122 states with continuous transitions as opposed to discrete subtypes of HSCs. Reactome pathway  
123 enrichment analysis (Sup Fig 2E) in combination with manual curation of enriched genes  
124 (Fig1D, Sup Table 4) allowed for assignment of labels to each state/cluster. Three HSC  
125 clusters equally made up 98% of control cells (Fig 1F) and two minor clusters comprised 2% of

126 control HSCs. Consistent with the FACS results (Sup Fig 1E), the proportion of HSCs residing in  
127 a ‘Cell cycle’ cluster marked by genes such as *Ki67* was very low (1%, Fig1C and 1F). A  
128 prominent HSC subpopulation contained cells that were defined by various immediate early  
129 genes (IEGs including *Nr4a1*, *Ier2* and *Fos* (Fig 1B – D). We therefore named this cluster  
130 ‘Activated’. We eliminated the possibility that the ‘Activated’ cluster arose due to an unspecific  
131 artifact of the cell isolation procedure since LSKs did not have an ‘Activated’ cluster and the  
132 proportion of *Nr4a1* expressing cells was much smaller (Fig 2D and Sup Fig 4B). HSCs have  
133 been tightly linked to dormancy and quiescent states (Foudi et al., 2009, Wilson et al., 2008, Qiu  
134 et al., 2014). The cluster adjacent to the ‘Activated’ state was termed ‘Quiescent’ because cells  
135 within this population showed the highest expression levels of previously described HSC  
136 markers (Cabezas-Wallscheid et al., 2017, Chen et al., 2016, Wilson et al., 2015, Acar et al.,  
137 2015, Gazit et al., 2014, Balazs et al., 2006) (Sup Fig 2F). Furthermore, ‘Quiescent’ HSCs did  
138 not express IEGs (Fig 1C) and were located most distal to the ‘Cell cycle’ cluster in UMAP  
139 space (Fig 1B-D). The ‘Metabolism’ cluster was comprised of the most metabolically active  
140 HSCs and showed enrichment of transcripts involved in translation initiation (*Eif5a*, *Eif4a1*),  
141 nucleotide metabolism (*Nme1*, *Dctpp1*), ribosome assembly (*Ncl*, *Nop56*, *Nop10*, *Npm1*),  
142 protein chaperones (*Hsp90*, *Hsp60*) and was located adjacent to the ‘Cell cycle’ cluster (Fig 1B-  
143 D). We next evaluated whether treatment with niche stimulants shifts the distribution of cells  
144 between clusters (Fig 1E). Interferons induced by poly(I:C) treatment increased the proportion of  
145 HSCs within the ‘Interferon’ cluster from 1% to 42% (Fig 1F, p-value (DPA) < 10<sup>-5</sup>). The  
146 ‘Interferon’ cluster was characterized by expression of interferon response genes such as *ligp1*,  
147 *Isg15*, *Ifit1*, and *Oas2* (Fig 1D). *In vivo* treatment with dmPGE<sub>2</sub> gave rise to a novel cluster  
148 named ‘Acute activation’ (Fig 1B) that contained 55% of dmPGE<sub>2</sub>-treated HSCs (Fig 1F). The  
149 cluster itself was entirely composed of dmPGE<sub>2</sub>-treated HSCs (Fig 1G) and marker genes  
150 include known cAMP-response genes such as *Fosl2* (Fig 1C and D) and the  
151 phosphodiesterases *Pde10a*, *Pde4b* and *Pde4d* (Fig 1D). G-CSF and indomethacin induced  
152 slight shifts in cell distribution compared to control (Fig 1E) but did not significantly alter cell  
153 proportions between clusters (Fig 1F, p-value (DPA) > 0.05 for all clusters). In conclusion, at  
154 baseline HSCs were equally distributed between three main transcriptional states, here defined  
155 as the ‘Quiescent’, ‘Activated’ and ‘Metabolism’ (Fig 1F) with few HSCs residing in ‘Interferon’  
156 and ‘Cell cycle’ states. A two-hour *in vivo* pulse with poly(I:C) or dmPGE<sub>2</sub> significantly altered  
157 distributions of HSCs between pre-existing transcriptional states and, in the case of dmPGE<sub>2</sub>,  
158 allowed for a novel transcriptional state to surface.

159

160 **Evaluation of scRNA-Seq phenotypes in entire LSK compartment to identify HSC specific**  
161 **cell states**

162 In order to evaluate specificity of transcriptional heterogeneity observed within HSCs and their  
163 response to niche signals, we analyzed the transcriptome of the entire LSK compartment, which  
164 encompasses both HSCs and MPPs (Sup Fig 1A, 1G and Sup Fig 2A). To assess  
165 transcriptional response and cell states in phenotypically defined MPPs (Cabezas-Wallscheid et  
166 al., 2014, Oguro et al., 2013, Pietras et al., 2015) (MPP, MPP1, MPP2, MPP3/4, Sup Fig 1A) a  
167 Hashtag Oligonucleotide (HTO) labelling strategy was used that is part of the Cellular Indexing  
168 of Transcriptomes and Epitopes by Sequencing (CITE-Seq) methodology (Sup Fig 4A, Fig 2B  
169 and Methods (Stoeckius et al., 2018)). CITE-Seq enables tracking of cell surface phenotypes in  
170 scRNA-Seq data through barcoding of cells with antibody conjugated DNA-oligos. ScRNA-Seq  
171 gene expression of marker genes such as *Cd34*, *Cd48* and *Cd150* (*Slamf1*) matched the  
172 surface phenotypes used for sorting of CITE-Seq barcoded MPPs, confirming that our workflow  
173 was successful (Fig 2C, Sup Fig 4B). Similar to the approach used for HSCs, we analyzed  
174 transcriptomic data from LSK cells as an aggregated set consisting of all four niche  
175 perturbations and control. We discovered a total of eight cell states, which similarly to HSCs  
176 displayed enrichment as opposed to exclusive expression of marker genes (Fig 2A). These  
177 clusters were labeled through analysis of enriched genes (Fig 2D, Sup Table 4), their  
178 composition of phenotypically defined cell populations tracked with CITE-Seq (Fig 2B and 2H)  
179 and by comparison to the earlier defined HSC clusters (Sup Fig 4C). LSK clusters most similar  
180 to the 'Quiescent' and 'Activated' HSC state were named 'Progenitor' and 'Primed', respectively.  
181 The 'Progenitor' cluster encompassed the majority of phenotypic HSCs and was significantly  
182 depleted of MPP3/4s compared to all other clusters (Fig 2H, DPA p-values < 0.02). Conversely,  
183 phenotypic HSCs were almost exclusively composed of 'Progenitor' cluster cells (Fig 2F). The  
184 location of HSCs at the edge of the UMAP plot could indicate the origin for differentiation (Fig  
185 2B and Sup Fig 4F). LSK cells in the 'Primed' cluster represent a more committed state given  
186 their expression of *Cd34* and *Flt3*. Enrichment of *Cd37* and *Sox4* suggest priming towards a  
187 lymphoid fate (Fig 2D (Sun et al., 2013, Zou et al., 2018)). The two LSK clusters 'Cell cycle' and  
188 'Metabolism' contained cells that are mitotically active or are on the verge of entering the cell  
189 cycle, respectively. Comparison of the top 100 enriched genes between clusters indicated a  
190 33% overlap between the LSK 'Metabolism' cluster and the HSC 'Metabolism' cluster and 41%  
191 common enriched genes between the LSK 'Metabolism' cluster and the HSC 'Cell-cycle' cluster  
192 (Sup Fig 4B - C and Fig 2D). The myeloid cluster is defined by expression of genes such as  
193 *Mpo*, *Ctsg*, *Fcer1g* and *Cebpa* (Fig 2D). Consistent with previous reports (Pietras et al., 2015),

194 MPP2s contained the highest proportion (7.6%) of myeloid cells and comprise 28% of the entire  
195 'Myeloid' cell cluster (Fig 2F and 2H). Control-treated LSKs were distributed amongst four main  
196 clusters, those being 'Primed', 'Progenitor', 'Metabolism' and 'Cell cycle', that together  
197 encompassed 99% of control LSK cells (Fig 2E). Similar to our observations in HSCs, only G-  
198 CSF and indomethacin treatment did not alter cellular distributions between LSK clusters (Fig  
199 2E, Sup Fig 4G). Conversely, dmPGE<sub>2</sub> and poly(I:C) gave rise to novel clusters that were  
200 absent in control LSKs (Fig 2E and G). These treatment-induced states displayed transcriptional  
201 profiles that were similar to the HSC equivalents (Sup Fig 4B and C, Fig 2D). Surprisingly, and  
202 in contrast to HSCs, no 'Interferon' responsive cell state was present in LSKs at baseline (Fig  
203 2E). Poly(I:C) treatment induced two interferon responsive clusters in LSKs, of which one  
204 showed higher mitotic activity ('Interferon cell cycle', Fig 2D and Sup Fig 4C). In summary,  
205 single-cell transcriptome analysis of a CITE-Seq validated LSK compartment revealed an  
206 increased proportion of lineage-committed and mitotically active and an absence of steady-state  
207 interferon responsive cells compared to HSCs. The changes in cell distribution between clusters  
208 upon niche stimulation were highly similar between LSKs and HSCs. Therefore using this  
209 analytic approach we did not uncover any HSC-specific cellular behaviors upon signaling from  
210 the niche.

211

### 212 **Within cluster analysis detects subpopulation specific effects of niche perturbations**

213 To assess niche-induced transcriptional changes in greater detail we used "Model-based  
214 Analysis of Single-cell Transcriptomics" or MAST (see Methods, (Finak et al., 2015)). This  
215 approach allowed us to perform differential expression analysis on stimulants compared to the  
216 control within each cell state cluster. We compiled differentially expressed genes (DEGs) of the  
217 four stimulant conditions at three levels of expression changes across all clusters, that is using a  
218 1.5-fold change, 1.2-fold change, and no fold-change cutoff (FDR < 0.01 see Methods and Sup  
219 Table 5). We then aggregated genes based on common ('up/down overlap') or unique  
220 expression ('up/down HSC/LSK only') within HSCs or LSKs (Fig 3A-D). G-CSF treatment  
221 perturbed gene expression more strongly within LSKs (green bars, Fig 3A) whereas interferon  
222 stimulation by Poly(I:C) predominantly affected HSCs (purple bars, Fig 3B). Receptor  
223 expression did not completely explain this difference since both the G-CSF receptor *Csf3r* and  
224 the type I interferon receptors *Ifnar1* and *Ifnar2* were expressed in a higher proportion of LSK  
225 cells compared to HSCs (Fig 3E and F). Indomethacin was found to selectively affect HSCs but  
226 overall very few genes were differentially expressed (Fig 3C). dmPGE<sub>2</sub> led to a balanced effect

227 on HSCs and LSKs, with neither compartment dominating the DEGs (Fig 3D). We further  
228 analyzed DEGs that were unique for specific clusters within either HSCs or LSKs. dmPGE<sub>2</sub>  
229 stimulation decreased expression of genes that promote the cell cycle, such as *Aurka*, *Plk1* and  
230 *Ki67*, within the LSK ‘Cell cycle’ cluster (Fig 3I, 3G; in red, Sup Fig 6C). As a comparison and to  
231 mimic a dataset that could be obtained by bulk RNA-Seq after sorting of MPPs, we analyzed  
232 DEGs in MPP surface phenotypes that were not split into distinct transcriptional clusters. DEG  
233 analysis within MPP surface phenotypes failed to recover the dmPGE<sub>2</sub>-mediated regulation of  
234 cell cycle genes (Fig 3H, in red). The differentially expressed cell cycle genes were likely not be  
235 detected in the pseudo-bulk MPP populations since only 6.4% (MPP) to 22% (MPP2, Fig 2F) of  
236 cells belong to the ‘Cell cycle’ cluster. A similar ‘dilution’ of treatment-specific effects within the  
237 ‘Cell cycle’ cluster also occurred following G-CSF treatment when comparing pseudo-bulk and  
238 cluster separated LSK cells (Sup Fig 4D and E, in red). These results illustrated that within-  
239 cluster-based differential expression analysis is highly sensitive in identifying genes specific to  
240 particular transcriptional states within a cellular compartment. In contrast to between-cluster cell  
241 distribution analysis, the within-cluster approach revealed specific transcriptional responses to  
242 niche signals in HSCs and LSKs.

243

#### 244 **Endogenous cell states distinguish TLR- and IFN-specific responses of Poly(I:C)** 245 **treatment**

246 To identify distinct patterns of regulation for different stimulations and hematopoietic stages, we  
247 selected genes that were differentially expressed within at least one HSC or LSK cluster. We  
248 then averaged expression of all cells within a cluster and grouped single cell clusters and genes  
249 by hierarchical clustering for HSCs (Sup Fig 5, Sup Table 6) and LSKs (Sup Fig 6, Sup Table  
250 7). Poly(I:C) binds to Toll-like receptor 3 (TLR3) (Alexopoulou et al., 2001) which leads to  
251 expression of Type 1 interferons (IFN $\alpha$  and IFN $\beta$ ) that in turn signal via IFN $\alpha/\beta$  receptor 1  
252 (*Ifnar1*) and 2 (*Ifnar2*) heterodimers, all of which are expressed in HSCs (Fig 3E). We identified  
253 two expression patterns in poly(I:C)-treated HSCs that are consistent with toll-like receptor and  
254 interferon receptor signaling. The first expression pattern is driven by induction of poly(I:C)  
255 responsive genes across all cell states. In addition, these genes were also specifically enriched  
256 in the ‘Interferon’ cluster already prior to poly(I:C) stimulation (Fig 3J; ‘Up Interferon’). Genes  
257 within this group are either directly downstream of type 1 interferon receptors, such as *Stat2* and  
258 *Irf9*, or act as effector proteins involved in viral interferon response such as *Apobec3* and  
259 *Eif2ak2* (Fig 3J, Sup Fig 4A). The high expression of several interferon-induced viral response  
260 genes (e.g. *Bst2*, *Ifitm3*, *Ube2l6*, and *Rnf213*) in the control ‘Interferon’ cluster might point to a



261 state of general surveillance for viral infection at baseline (Fig 3J, Sup Fig 5A). The second  
262 expression pattern ('Up Toll-Like Receptor') results from genes that are induced by Poly(I:C)  
263 treatment, especially in the poly(I:C) 'Interferon' cluster, but show low expression at baseline,  
264 even in the control 'Interferon' cluster. (Fig 3J, Sup Fig 5A). Genes within this signature include  
265 *Nfkbia*, *Peli1*, *Map3k8*, and *Rps6ka3* and are part of TNF $\alpha$  and Toll-like signaling pathways.  
266 This expression profile might therefore represent a more direct response of poly(I:C) interaction  
267 with Tlr3. Comparison of differential expression patterns across cell states allowed us to  
268 distinguish between poly(I:C)-mediated TLR- and interferon-based signaling.

269

### 270 **G-CSF triggers changes within a metabolic transcriptional state without changing cell** 271 **distribution between HSC and LSK clusters**

272 G-CSF has been identified as a potent enhancer of granulocyte and neutrophil differentiation  
273 (Metcalf and Nicola, 1983). It is widely used as a mobilizing agent for hematopoietic stem cells  
274 in a therapeutic setting (Bendall and Bradstock, 2014). In line with its clinical use, we found  
275 niche adhesion receptors such as *ckit* and *Cd9* (Leung et al., 2011) to be downregulated  
276 following *in vivo* G-CSF treatment (Sup Fig 5B, purple arrows).

277 Overall G-CSF induced most DEGs within the HSC 'Metabolism' cluster. Hierarchical clustering  
278 revealed that G-CSF treatment alters the expression profile of the HSC 'Metabolism' cluster in a  
279 way that makes it more similar to 'Cell cycle' states (Sup Fig 5B). This resemblance is driven by  
280 induction of genes related to transcription, such as RNA binding proteins (*Hnrmpd*, *Hnrmpf*,  
281 *Hnrnpa2b1*), as well as splicing factors (*Srsf7*, *Sf3b1*, *Srsf2*) ('Transcription', Fig 3K). G-CSF  
282 also increased expression of transcripts involved in translation, including genes involved in  
283 ribosome biogenesis (*Nop14*, *Nip7*, *Wdr43*, *Wdr12*) and translation initiation (*Eif4a1*, *Eif4ebp1*).  
284 These transcripts were not expressed in the 'Cell cycle' state at baseline ('Translation', Fig 3K)  
285 and might be related to G-CSF-induced fate commitment towards differentiation. Overall, a two-  
286 hour pulse of G-CSF pushed HSCs towards a more metabolically active state. Our scRNA-Seq  
287 data are consistent with the original description of G-CSF as a growth factor that regulates  
288 myeloid differentiation and indicates early transcriptional responses leading to HSC  
289 mobilization.

290

### 291 **Endogenous Prostaglandins regulate immediate early genes within 'Activated' cell states**

292 To investigate signaling from the niche in a more physiological setting, we orally treated mice for  
293 one week with indomethacin to deplete endogenous prostaglandins. Differential expression

294 analysis identified only 21 genes (1.2-fold change cutoff) to be differentially expressed  
295 compared to the control (Fig 3A). Of the upregulated genes, 10 out of 12 can be classified as  
296 IEGs (e.g. *Fos*, *Fosb*, *Jun*, *Klf4* or *Klf6*) (Sup Fig 5D). While cell proportions did not change  
297 between the HSC clusters (Fig 1F), distribution of cells shifted slightly towards the periphery  
298 within the UMAP plot (Fig 1E). This change in distribution was seen with individual cluster  
299 marker genes such as *Fos* and other IEGs (Fig 4A, 4B and Sup Fig7A, 7 B). To further  
300 investigate the influence of endogenous prostaglandin depletion on cell distribution while taking  
301 the entire transcriptional landscape into account, we computed diffusion pseudotime (DPT)  
302 (Haghverdi et al., 2016) between the ‘Activated’ and ‘Quiescent’ cluster in HSCs. The cell with  
303 the combined highest expression of the three top cluster markers for the ‘Activated’ state (Fig  
304 4C, see Methods) was set as root cell and DPT was calculated originating from that root cell  
305 (Fig 4D). Indomethacin-treated cells displayed a significant shift to the left in overall pseudotime  
306 kernel density distribution (KDE), which is indicative of overall lower pseudotime (Fig 4E, p-  
307 value =  $5.8 \times 10^{-12}$  by Mann–Whitney U-test). No shift was observed when comparing the control  
308 to G-CSF treated HSCs (Fig 4F, p-value = 0.18). Ranking cells for each treatment condition  
309 according to pseudotime and averaging gene expression in 10 equally sized bins (quantile rank  
310 1-10) further illustrated the change in expression of *Fos* and other IEG genes following  
311 indomethacin, especially at lower pseudotimes (Fig 4G and Sup Fig 7C; indicated by asterisks).  
312 Genes that were not part of the activated gene signature, such as *Ly6a*, did not follow the same  
313 pattern (Fig 4H), nor was a similar trend observed in response to G-CSF treatment (Sup Fig  
314 7D). The pseudotime analysis of the scRNA-Seq data indicated a specific shift in IEG  
315 transcriptional state upon depletion of endogenous prostaglandins. To further confirm the effect  
316 of endogenous prostaglandins on IEGs in an orthogonal assay, we measured single cell protein  
317 levels by intracellular flow cytometry for FOS. Across two independent experiments, a seven  
318 day *in vivo* indomethacin treatment led on average to a 34% (SD = 8.2%) reduction in FOS  
319 mean fluorescent intensity (MFI) in HSCs (p-value =  $6.2 \times 10^{-3}$ , t-test with Welch’s correction)  
320 and a mean 35% (SD = 8.6%) decrease in LSKs (p =  $6.6 \times 10^{-3}$ , Fig4I and J). Overall,  
321 endogenous prostaglandin levels impact both the transcriptional state and protein levels of FOS  
322 and potentially other IEGs.

323

### 324 **HSC-specific chromatin architecture is an intrinsic regulator of differential response to** 325 **niche signals**

326 To better understand HSC intrinsic factors regulating the transcriptional ‘receptiveness’ to  
327 signals, we assessed chromatin states using single cell ATAC-Seq (scATAC-Seq, see Methods)

328 of sorted HSCs and MPPs. We clustered cells based on chromatin accessibility in HSCs (Fig  
329 5B) and LSK cells consisting of MPPs and HSCs (Fig 5E and F, Methods). To gain insight into  
330 the nature of the differentially accessible chromatin regions, we computed a per-cell  
331 transcription factor (TF) motif activity score using ChromVar (Schep et al., 2017) and evaluated  
332 enrichment of these scores across clusters. The motif activities of transcription factors STAT3,  
333 NF- $\kappa$ B, and CREB1 that are immediately downstream of G-CSF, Poly(I:C), and Prostaglandins  
334 (Fig 5A), respectively, were homogeneously distributed in both HSCs and LSKs (Sup Fig 8A,  
335 8B, and Sup table 8). This result suggested that all cells have an equally responsive potential to  
336 these niche signals based on their accessible chromatin states. We did detect differential  
337 enrichment of motifs for transcription factors that are further downstream in the response to  
338 niche signals. Specifically, we found differential enrichment of the interferon signaling response  
339 element (ISRE) motif activity score in cluster 1 (Fig 5C) and AP-1 motif score in cluster 0 (Fig  
340 5D). Interferon-regulatory factors (IRFs) that bind ISREs are induced by NF- $\kappa$ B signaling as well  
341 as direct targets of Poly(I:C) intracellular binding ((Negishi et al., 2018), Fig 5A). In addition to  
342 IRFs, HSC cluster 1 is characterized by motifs for transcriptional regulators that are important  
343 for cellular metabolism, cell growth, and differentiation such as CTCF, YY1, and NRF1 (Fig 5G  
344 and Sup Fig 8C). Enrichment of a similar set of motifs in LSK cell cluster 5 (Fig 5F and H in light  
345 green, Sup Fig 8G) indicated that this motif combination is not unique for HSCs. The location of  
346 cluster 5, being most distally from phenotypic HSCs on the UMAP plot (Fig 5E), further  
347 suggested that cells in this chromatin state are committing to or undergoing differentiation.  
348 The AP-1 motif which is specifically enriched in HSC cluster 0 can be bound by FOS and JUN,  
349 both downstream effectors of the Prostaglandin/CREB1 signaling pathway ((Luan et al., 2015),  
350 Fig 5A). We furthermore found motif activity enrichment in HSC cluster 0 for several key HSC  
351 lineage-specific master transcription factors including RUNX, GATA, and PU.1 (SPI1) (Fig 5I  
352 and Sup Fig 8D) as well as SMAD, another signal-responsive transcription factor (Sup Fig 8E  
353 and F). In contrast to IRFs, LSK cells did not contain a corresponding cluster where the same  
354 motifs cooccur as in HSC cluster 0 (Fig 5J and Sup Fig 8H). Therefore, the chromatin features  
355 of cluster 0 may be specific for HSCs. We found no indication that differential responsiveness to  
356 the niche stimulants is a result of distinct chromatin states of transcription factor motifs directly  
357 downstream of these signals. Rather, our analysis implicated cell intrinsic heterogeneity of  
358 further downstream effectors, such as AP-1 and IRFs. The specific motif co-occurrence of AP-1  
359 and HSC-lineage specific master factors, combined with their absence in LSKs, indicates an  
360 HSC-specific chromatin state.

361

## 362 Discussion

363 Here, we provide the first transcriptional and epigenetic single cell analysis of a highly purified,  
364 functionally validated HSC population. Our work reveals that highly purified HSCs exist in fluent  
365 transcriptional and epigenetic states rather than distinctly separated cell types. Niche  
366 perturbations rapidly shift HSC distribution between HSC states within hours of signaling,  
367 providing evidence that the transcriptional states are highly dynamic and allow HSCs to quickly  
368 transition between states in response to different stimuli. Our single cell chromatin studies  
369 indicate cell intrinsic HSC heterogeneity that predisposes subpopulations for certain  
370 transcriptional responses. We detected an HSC specific co-occurrence of signaling and lineage-  
371 specific transcription factor motif activities that is consistent with our previous observation in  
372 human hematopoietic progenitors (Trompouki et al., 2011, Choudhuri et al., 2020)). Absence of  
373 similar chromatin features in LSK progenitors may implicate a link to some of the unique  
374 functional capacities of HSCs, such as self-renewal. Overall, our data indicates that the single  
375 cell landscape of *in vivo* derived, functional HSCs is made up of a unique chromatin architecture  
376 with fluent transcriptional states, some of which can be rapidly influenced by signals from the  
377 niche.

378  
379 Our combined scRNA-Seq and CITE-Seq approach allowed us to gain insights into the  
380 transcriptional landscape of HSCs and phenotypically defined MPP populations within the LSK  
381 compartment at steady state and following niche perturbations. Our results enabled us to  
382 connect the transcriptional profile on a single cell level to the previously described phenotypic  
383 behaviors of these MPP populations (Oguro et al., 2013, Pietras et al., 2015, Cabezas-  
384 Wallscheid et al., 2014). In addition, the CITE-Seq approach allowed us to cross-validate our  
385 transcriptional cell state assignments. The HTO CITE-Seq method provided a flexible tool to  
386 evaluate and compare transcriptional profiles within phenotypically defined populations because  
387 the technology used here is not dependent on the availability of specifically conjugated  
388 antibodies against particular surface receptors. In addition, *Xist* expression was used to  
389 deconvolute pooled male and female cells. While our analysis revealed only a weak sexual  
390 dimorphism that is consistent with previous reports (Nakada et al., 2014, Gal-Oz et al., 2019),  
391 the negligible additional investment to obtain data from both sexes may become the default  
392 experimental design in mammalian scRNA-Seq experiments. Our work presents evidence for  
393 two value-adding pooling strategies that allow for further insights into cell populations analyzed  
394 by scRNA-Seq.

395

396 We used a two-pronged strategy to assess the specificity of niche perturbations in HSCs or  
397 LSKs. First, we determined changes of cell proportions between cell states. Second, we  
398 evaluated differential expression within particular cell states following stimulation. The strength  
399 of transcriptional perturbation could not solely be estimated based on the distribution of cells  
400 within clusters alone. G-CSF did not change the cell proportions between clusters but rather  
401 elicited strong transcriptional responses within a given cell state. Furthermore, analysis of DEGs  
402 within clusters helped tease apart interferon- versus toll-like receptor response genes induced  
403 by Poly(I:C) treatment. We also uncovered a specific effect of dmPGE<sub>2</sub> that only occurs within  
404 the LSK 'Cell cycle' cluster. A recent study corroborates our finding that dmPGE<sub>2</sub> affects cell  
405 cycle states in the bone marrow (Patterson et al., 2020). Our results show that this within-cluster  
406 differential gene expression analysis was most sensitive to reveal HSC or LSK specific  
407 responses to niche perturbations.

408

409 There is a tradeoff between the strength of a perturbation required for experimental robustness  
410 versus studying signals that are more physiologically relevant but lead to more subtle changes  
411 within and between cells. Here, we evaluated response of HSCs to three different activators  
412 mimicking niche signals that were dosed 2-4 orders of magnitude higher than what an animal  
413 would ever encounter during actual injury or infection (Eyles et al., 2008, Porter et al., 2013,  
414 Hoggatt et al., 2013, Sheehan et al., 2015). To assess niche-derived signals in a more  
415 physiological setting, we administered the Cox1/2 inhibitor indomethacin orally for one week to  
416 deplete endogenous prostaglandins. As expected, the changes in gene expression with  
417 indomethacin were much weaker than those observed after acute injection with dmPGE<sub>2</sub>, G-  
418 CSF, and poly(I:C). scRNA-Seq analysis offers unique tools to evaluate gene expression  
419 changes in response to weak perturbations. Pseudotime analysis showed that depletion of  
420 endogenous prostaglandins using indomethacin leads to a small but significant shift in the  
421 transcriptional state of HSCs. The effect of indomethacin on IEGs such as *Fos* was further  
422 validated in independent FACS experiments which showed that the transcriptional programs  
423 implicated through pseudotime were also found to be perturbed using this orthogonal assay.  
424 How exactly the increase in RNA levels of *Fos* observed in scRNA-Seq can be reconciled with  
425 decreased FOS protein levels determined by FACS analysis will need to be addressed in future  
426 experiments. Another important implication and potential caveat highlighted by our findings is  
427 that RNA and protein levels may not always positively correlate, even on a single cell level.  
428 Regardless, scRNA-Seq technologies provides sensitive tools to interrogate subtle changes in  
429 cellular states.

430

431 In summary, we showed that single cell approaches provide a rich and sensitive tool to analyze  
432 transcriptional and epigenetic states of HSCs during homeostasis and upon niche perturbation.  
433 We found that HSCs exist in dynamic cell states and niche signals can induce rapid transitions  
434 between, as well as changes within, these HSC states. While our work does not reveal whether  
435 these transcriptional states are associated with specific niches *in vivo*, novel spatial  
436 transcriptomic approaches provide exciting new opportunities to address such questions  
437 (Rodrigues et al., 2019). Additionally, recently developed barcoding strategies enable  
438 assessment of niche-induced transcriptional changes and functional potential of single cells  
439 within the same experiment (Rodriguez-Fraticelli et al., 2020). Understanding endogenous  
440 levels of niche-derived factors and the associated transcriptional and epigenetic responses will  
441 advance our basic understanding of stem cells and their potential applications in the clinic.

442

## 443 **Materials and Methods**

444

### 445 ***WET LAB METHODS***

446

#### 447 **Mice and niche stimulant treatment**

448 For the HSC Replicate 1 experiment we used the following mouse strain (#016617) that was  
449 obtained from Jackson labs but bred in house. For niche stimulant treatments male and female  
450 mice (8–10 weeks) were ordered from Jackson labs (strain CD 45.2 (Ly5.2), #00664). Mice  
451 were kept for at least 1 week in the animal facility before initiating experiments and allocated at  
452 random (by cage) into experimental groups. Indomethacin (Sigma, 6mg/l) was administered for  
453 7 days in acidified drinking water to maintain stability (Curry et al., 1982, Pratico et al., 2001).  
454 Indomethacin supplemented drinking water was changed every other day. Mice were injected  
455 with the following drugs and euthanized after 2 hours: Poly(I:C) HMW (Invivogen), IP injection  
456 10mg/kg (Pietras et al., 2014). G-CSF Recombinant Human Protein (Thermo fisher), IP  
457 injection, 0.25mg/kg (Morrison et al., 1997). DmPGE2 (Cayman), SC injection, 2mg/kg(Hoggatt  
458 et al., 2013). Mice were weighed before injection and injection volume was adjusted to ensure  
459 equal dose between individual mice. The ‘control’ condition from the niche stimulant treatments  
460 was also used as the second independent biological replicate of unperturbed HSCs (HSC  
461 Replicate 2). All animal procedures were approved by the Harvard University Institutional  
462 Animal Care and Use Committee.

463

#### 464 **Bone marrow preparation and Fluorescence activated cell sorting (FACS)**

465 Whole Bone marrow was isolated from femur, tibia, hip and vertebrae via gentle crushing using  
466 a mortar and pestle. Stem and progenitor cells were enriched via lineage depletions (Miltenyi  
467 Biotech, 130-090-858). Antibodies, dilutions and vendors are listed in Sup Table 9. Cells were  
468 stained for 1.5 hours based on published best practice protocols for assessing CD34 labelling  
469 (Ema et al., 2006). HSCs (LSK, CD48-, CD150+, CD34-), MPP1s (LSK, CD48-, CD150+,  
470 CD34+), MPPs (LSK, CD48-, CD150-), MPP2s (LSK, CD48+, CD150+), and MPP3/4s (LSK,  
471 CD48+, CD150-) were sorted on a FACSAria (Becton Dickinson) and representative sorting  
472 scheme is shown in Supplemental Fig 1A. Purity of > 80% was ensured by reanalyzing each  
473 sorted population.

474

475

## 476 **Sample size estimation and sample batching**

477 To determine appropriate sample sizes of mice and HSCs we performed an initial experiment  
478 on fresh HSCs (HSC Replicate1) which yielded estimated number of 2382 cells (after filtering),  
479 and which resolved biologically meaningful clusters. In subsequent experiments we therefore  
480 targeted obtaining a similar or higher cell number. For niche stimulant treatment we based our  
481 sample size of 5 male and 5 female mice on this initial experiment. Because of sample  
482 processing times a maximum of two conditions could be performed on the same day, resulting  
483 in three separate days of experiments. To mitigate batch effects resulting from different  
484 experimental days the following precautions were taken. (1) All mice included in the niche  
485 stimulant treatment were ordered from the same batch from JAX. (2) Control mice were  
486 administered acidified water injected with DMSO to control for both unspecific perturbations that  
487 might result from the niche stimulant treatments. (3) All experiments were performed within less  
488 than one week and single cell libraries were prepared together for all samples after the initial  
489 droplet reaction was frozen. (4) FACS gates were set up initially but left constant for each  
490 experiment. Single color controls as well as Fluorescence minus one (FMO) controls ensured  
491 that there was minimal day-to-day technical drift on the FACS instrument.

492

## 493 **Intracellular staining for FACS**

494 BM extraction, lineage depletion and surface marker staining were performed as described  
495 above. Cells were fixed and permeabilized for intracellular staining according to manufacturer's  
496 instructions (BD biosciences, 554714). Intracellular staining was performed for 30 minutes on  
497 ice. Samples were analyzed on an LSRII FACS analyzer.

498

## 499 **Limit dilution Transplantation assay**

500 Recipient CD45.2 (Jax #00664) mice were gamma-irradiated (Cs-137 source) with a split dose  
501 of 5.5 Gy each one day before transplantation. HSCs were isolated from CD45.1 (Jax #002014)  
502 donors and transplanted with 200 000 whole bone marrow cells (CD45.2) via retro-orbital  
503 injection. Donor cell engraftment was monitored monthly for 16 weeks using a LSRII FACS  
504 analyzer (Becton Dickinson). Flow cytometry data were analyzed with FlowJo (Tree Star). HSC  
505 frequency was calculated using the following website <http://bioinf.wehi.edu.au/software/elda/>.

506

## 507 **Single-cell RNA and ATAC sequencing library preparation and sequencing**

508 Male and female cells were sorted separately but pooled in equal ratios before further  
509 downstream processing. For CITE-Seq HTO labelling of MPP populations, 0.25ug of TruStain



510 FcX™ Blocking reagent (Biolegend) was added for 10 minutes on ice. Each MPP populations  
511 was labelled with 1ug of TotalSeq™ antibody cocktail (Biolegend, see Sup Table 9) and  
512 incubated for 30 minutes on ice. After washing, cells were resuspended in small amounts,  
513 counted and pooled in equal ratios. Each drug treatment condition resulted in one pooled MPP  
514 and one HSC sample that were processed separately for scRNA-Seq according to  
515 manufacturer's recommendations (10X Genomics, 3' V2 for HSC Replicate1 experiment and V3  
516 for niche stimulant treatments). Briefly, for pooled MPPs, no more than 10 000 cells were  
517 loaded. For HSCs, all sorted cells (between 2222 sorted events for dmPGE2 and 12017 sorted  
518 events for control) were loaded on the 3' library chip. For preparation of HTO – surface libraries  
519 manufacturer's recommendations (Biolegend) were followed. For ATAC-seq HSCs and MPPs  
520 (pooled MPP, MPP1, MPP2 and MPP3/4) were sorted as described above from 5 male and 5  
521 female mice (strain CD 45.2 (Ly5.2), JAX strain #00664). Nuclei were isolated and libraries were  
522 prepared using manufacturers recommendations (10x Chromium Single Cell ATAC). Libraries  
523 were sequenced on a Next-seq 500, 75 cycle kit ('Replicate 1', scRNA-Seq) and NOVAseq  
524 6000, 100 cycle kit ('Replicate 2' and niche stimulant treatments, scRNA-Seq, sc-ATAC-seq).

525

## 526 **COMPUTATIONAL AND STATISTICAL ANALYSES**

527 All code and a detailed description of the analysis is available in the following Github repository  
528 [https://github.com/evafast/scrnaseq\\_paper](https://github.com/evafast/scrnaseq_paper)). To ensure reproducibility the entire analysis  
529 (except cellranger and Cite-seq count) was entirely performed in Docker containers. Containers  
530 used for the analysis are indicated in the Jupyter notebooks and corresponding images are  
531 available on dockerhub (repository: evafast1). Interactive cell browser web app is available  
532 here: (<https://mouse-hsc.cells.ucsc.edu>). Raw data are available with GEO accession code  
533 GSE165844.

534

### 535 **Demultiplexing and generation of count matrices**

536 Cellranger (v3.0.1) command 'mkfastq' was used to demultiplex raw base call (BCL) files into  
537 individual samples and separate mRNA FASTQ files and HTO surface fastq files. The cellranger  
538 'count' command was used with default options to generate gene by cell matrices from mRNA  
539 FASTQ files. CITE-Seq count (version 1.4.3) was used to generate surface count by cell  
540 matrices from the HTO surface FASTQ libraries. For the fresh HSC Replicate1 experiment  
541 cellranger (v2.1.0) was used for demultiplexing and count matrix generation. The mm10  
542 reference genome was used for all alignments. For scATAC-seq cellranger-atac mkfastq and  
543 count (1.2.0) was used for demultiplexing and alignment and generation of the fragment file. To

544 generate the count matrix MACS2 was run with default parameters (keeping duplicates) on the  
545 aligned reads. Resulting peak summits were extended to 300 bp and counts were extracted  
546 from Fragment file using a custom script (see Github repository) to generate a count matrix.

547

#### 548 **Quality control and Filtering and dimensionality reduction of scRNA-Seq data**

549 The main parts of the bioinformatic analysis of scRNA-Seq data was performed using the  
550 python package scanpy (Wolf et al., 2018). For filtering and quality control best practice  
551 examples were followed (Luecken and Theis, 2019). Count matrices were filtered on a gene and  
552 cell level. Cells were excluded with either less than 3,000 UMIs, less than 1,500 (LT) or 2,000  
553 (MPPs) genes or more than 20,000 (LT) or 30,000 (MPPs) counts. A cutoff of no more than  
554 10% UMIs aligned to mitochondrial genes per cell was applied. Genes expressed in less than  
555 20 cells were excluded from the analysis. Counts were normalized to 10,000 per cell and log  
556 transformed. Features (genes) were scaled to unit variance and zero mean before  
557 dimensionality reduction. To reveal the structure in the data we built a neighborhood graph and  
558 used the leiden community detection algorithm (Traag et al., 2019) to identify communities or  
559 clusters of related cells (see also below). The UMAP algorithm was used to embed the high  
560 dimensional dataset in a low dimensional space (Becht et al., 2018). Differential proportion  
561 analysis (DPA) was used for comparing cell proportions between clusters as previously  
562 described (Farbehi et al., 2019). Interactive visualization app of scRNA-Seq data was prepared  
563 using UCSC Cell Browser package (Speir et al., 2020).

564

#### 565 **Demultiplexing of CITE-Seq hashtag data**

566 We used the DemuxEM (Gaublomme et al., 2019) implementation in pegasuspy  
567 (<https://github.com/klarman-cell-observatory/pegasus/tree/0.17.1>) to assign MPP surface  
568 identities and demultiplex to the pooled MPP sample. First background probabilities  
569 ('pg.estimate\_background\_probs') were estimated using default settings and 'pg.demultiplex'  
570 was run adjusting the alpha and the alpha\_noise parameter to maximize cell retrieval by singlet  
571 classification. Assignments were validated by plotting count matrix in UMAP space and  
572 observing four distinct clusters indicative for the four HTO labels that were pooled. The  
573 proportion of demultiplexed cells matched the original pooling ratio. Analysis of coexpression of  
574 sex specific genes allowed for further validation of the doublet rate. Proportion of cells classified  
575 by DemuxEM as doublets exceeded doublet rate estimated by co-expression of sex specific  
576 genes.

577

578 **Batch correction**

579 Because of timing required for sort and sample prep it was impossible to sort HSCs from all  
580 conditions on one day (see also ‘Sample size estimation and sample batching’ above). To  
581 correct for potential batch effects we used ComBat (Johnson et al., 2007) with default settings  
582 on the log2 expression matrix, allowing cells to be clustered by cell type or cell state. Batch  
583 correction results were similar when we used Scanorama (Hie et al., 2019). To correct for  
584 potential sex specific differences Xist counts were regressed out. Raw data was used for all  
585 differential expression analysis and plotting of single cell gene expression values. Batch  
586 corrected counts were used for clustering and diffusion pseudotime analysis.

587

588 **Optimal cluster parameter selection**

589 Since HSCs and MPPs are highly purified cell populations we did not observe any clearly  
590 separated clusters in UMAP space. To aid the optimal choice of hyperparameters for leiden  
591 clustering we used a combination of Silhouette Coefficient and Davies–Bouldin index. We first  
592 validated this approach using the PBMC3K (from 10x genomics, `scanpy.datasets.pbmc3k()`)  
593 silver standard dataset. We iterated through a range of KNN nearest neighbors and Leiden  
594 resolution combinations measuring average Silhouette coefficient and Davies-Bouldin index in  
595 PCA space for each combination. Plotting the optimal value for Silhouette score and Davies-  
596 Bouldin index versus increasing numbers of clusters allowed for the determination of  
597 appropriate cluster number for the dataset. For the PBMC dataset there was a clear drop-off in  
598 optimal value after 8 clusters, which is corroborated by most single cell tutorials that also report  
599 8 clusters for this dataset. After validation of this approach on PBMCs we used assessed  
600 Silhouette Coefficient and Davies–Bouldin index for different clustering results of our own HSC  
601 and MPP datasets. This allowed us to select the optimal hyper-parameters for each cluster  
602 number. The approach was validated by using data driven parameters to compare two  
603 independent biological replicates of control HSCs (‘Repl\_1’ and ‘Repl\_2’).

604

605 **Differential expression using MAST**

606 Differential expression analysis was performed using MAST (“Model-based Analysis of  
607 Singlecell Transcriptomics, (Finak et al., 2015). This method is based on a Hurdle model that  
608 takes into account both the proportion of cells expressing a given transcript as well as transcript  
609 levels themselves while being able to control for covariates. Based on previous reports  
610 differential expression cutoff was set at 1.2 fold (Smillie et al., 2019) and a more stringent cutoff  
611 of 1.5 fold was also included. Only genes that were expressed in at least 5% of the cells were

612 considered for differential expression analysis. FDR (Benjamini & Hochberg) cutoff was set at  
613 1%. For drug treatments differential expression between treatment and control was assessed  
614 within the entire MPP or LT dataset and within each cluster controlling for number of genes per  
615 cell and sex. For differential expression analysis between male and female cells at baseline,  
616 control datasets were analyzed with clusters and number of genes as a co-variables. For sex  
617 specific effects of drug treatments samples were split by sex and analyzed separately. Resulting  
618 differential expression coefficients were compared between male and female cells. To identify  
619 gene signatures with common patterns, for each treatment average expression of differentially  
620 expressed genes was extracted per cluster, scaled (z-score) and grouped together by similarity  
621 using hierarchical clustering (seaborn.clustermap, Euclidian distance, single linkage).

622

### 623 **Diffusion pseudotime analysis**

624 For diffusion pseudotime analysis (Haghverdi et al., 2016) cells from the 'Quiescent' and  
625 'Activated' cluster were selected for the following treatments: control, indomethacin and G-CSF.  
626 We recalculated PCA and UMAP embeddings in this reduced dataset. Re-clustering using the  
627 Leiden algorithm was used to exclude outlier cells and assess top enriched genes within the  
628 new 'Activated' cluster. Raw expression of the three top enriched genes (Nr4a1, Nr4a2, Hes1)  
629 was summed to robustly select the most highly 'activated' cell as a root cell. Diffusion  
630 pseudotime was calculated with the following function in scanpy ('sc.tl.dpt') using default  
631 settings. Cells were ranked according to pseudotime and kernel density distribution was plotted  
632 using a bandwidth of 0.02. The Mann-Whitney U test was used to assess if cells from different  
633 samples are drawn from the same pseudotime distribution. To analyze gene expression across  
634 pseudotime, for each sample cells were split into ten equally sized bins according to ascending  
635 pseudotime. Bin 1 contained the first 10% of cells with the lowest pseudotime and bin 10  
636 contained the 10% of cells with the highest pseudotime. Average gene expression for  
637 representative genes were plotted for each bin and sample.

638

### 639 **Single cell ATAC-seq**

640 The R package Signac ([https://github.com/timoast/signac\\_version\\_0.2.5](https://github.com/timoast/signac_version_0.2.5)), an extension of Seurat  
641 (Stuart et al., 2019), was used for quality control, filtering of ATAC-seq peaks counts and  
642 plotting. Quality of scATAC dataset was ensured by presence of nucleosomal banding pattern  
643 and enrichment of reads around transcription start sites (TSSs). Cells were removed with a less  
644 than 1 000 or more than 20 000 fragments in peaks. Male and female cells were classified  
645 according to absence or presence of Y-chromosome reads. Since distribution of male and

646 female cells appeared uniform across all analyses no downstream correction was taken for sex.  
647 Term frequency-inverse document frequency (TF-IDF) was used for normalization and  
648 dimensionality reduction was performed by singular value decomposition (SVD). Cells were  
649 clustered using the Louvain community finding algorithm after a neighborhood graph was built  
650 with  $k = 20$  (HSCs) or  $k = 30$  (LSK) nearest neighbors. To calculate TF motif scores, ChromVAR  
651 (Schep et al., 2017) was run with default parameters using the JASPAR 2018 motif database.  
652

653 **Supplemental Tables**

654

655 **Supplemental Table 1: Sequencing metrics**

656 Sequencing metric output from cellranger.

657 **Supplemental Table 2: Overlap of differentially regulated genes in male and female HSCs**  
658 **and LSKs**

659 Table summarizing number of differentially regulated genes within male and female HSCs and  
660 LSKs. Over-representation analysis odds ratio and p-value were calculated using a Fisher's  
661 exact test.

662 **Supplemental Table 3: Differential expression result (MAST) by sex**

663 Each tab contains a treatment vs. control comparison (dmPGE<sub>2</sub>, Indo, Poly(I:C), G-CSF). Each  
664 cluster was compared to its respective control cluster separated by sex. Log fold change and  
665 adjusted p-value from the Hurdle model are listed for genes with p-values < 0.01.

666 **Supplemental Table 4: Marker gene enrichments in scRNA-Seq clusters**

667 Marker gene enrichment was calculated using a Wilcoxon-Rank-Sum test. Score (suffix '\_s')  
668 indicates the z-score of each gene on which p-value computation is based. Other fields are  
669 logfold change = suffix '\_l' and False discovery adjusted p-value – suffix '\_p'.

670 **Supplemental Table 5: Differential gene expression result (MAST)**

671 Each tab contains a treatment vs. control comparison (dmPGE<sub>2</sub>, Indo, Poly(I:C), G-CSF). Each  
672 cluster was compared to its respective control cluster. Log fold change and adjusted p-value  
673 from the Hurdle model are listed for genes with p-values < 0.01.

674 **Supplemental Table 6: Average expression per cluster of differentially regulated genes in**  
675 **HSCs**

676 Count normalized and log transformed UMI counts from were averaged across HSC clusters for  
677 differentially regulated genes from MAST

678 **Supplemental Table 7: Average expression per cluster of differentially regulated genes in**  
679 **LSKs**

680 Count normalized and log transformed UMI counts from were averaged across LSK clusters  
681 differentially for regulated genes from MAST.

682 **Supplemental Table 8: ChromVar TF motif activity score enrichment in LSK and HSC**  
683 **scATAC clusters**

684 ChromVar motif activity score enrichment for HSC and LSK scATAC clusters.

685 **Supplemental Table 9: List of antibodies used**

686 ***Acknowledgements***

687 The authors thank members of the Zon, Wagers, Camargo and Scadden lab for helpful  
688 technical and scientific discussions, Serine Avagyan and Elliott Hagedorn for critical reading of  
689 the manuscript, Sai Ma for scATAC-Seq analysis advice and critical reading of the manuscript,  
690 Maximilian Haeussler and Matthew Speir for help with setting up and hosting the cell browser  
691 app and the HCBI, HSCRB FACS core, Office of Animal Resources, and the Bauer Core Facility  
692 at Harvard University for technical support. This work was supported by grants from the National  
693 Institutes of Health (P01HL131477-04, R01 HL04880, PPG-P015PO1HL32262-32, 5P30  
694 DK49216, 5R01 DK53298, 5U01 HL10001-05, and R24 DK092760) (to L.I.Z.), the Leukemia &  
695 Lymphoma Society (Scholar grant 5372-15)(to E.M.F.) and a Boehringer Ingelheim Fonds PhD  
696 fellowship (to A.S.). L.I.Z. is an Investigator of the Howard Hughes Medical Institute.

697

698

699 ***Authorship Contribution***

700 E.M.F. and L.I.Z. designed the study; E.M.F., A.S. and M.M. performed the experiments and  
701 interpreted the data; E.M.F generated the figures and A.S. edited the figures; N.B. and J.G.  
702 provided technical guidance for single cell RNA-Seq experiments; E.M.F., E.L., N.B. and S.Y.  
703 performed bioinformatic analysis; E.M.F and Y.Z. supervised the bioinformatic analysis;  
704 F.C. and D.T.S. provided insights on the analysis and interpretation of the data; E.M.F. wrote  
705 the manuscript; A.S., M.M. and L.I.Z. revised the manuscript; all authors edited the manuscript;  
706 and L.I.Z. provided funding support.

707

708 ***Conflict-of-interest disclosure***

709 L.I.Z. is founder and stockholder of Fate, Inc., Scholar Rock, Camp4 therapeutics and a  
710 scientific advisor for Stemgent. D.T.S. is a director and equity holder of Agios Pharmaceuticals,  
711 Magenta Therapeutics, Editas Medicines, ClearCreekBio, and Life-VaultBio; a founder of Fate  
712 Therapeutics and Magenta Therapeutics; and a consultant to FOG Pharma and VCanBio. The  
713 other authors declare no competing interests.

714

## 715 **References**

- 716 ACAR, M., KOCHERLAKOTA, K. S., MURPHY, M. M., PEYER, J. G., OGURO, H., INRA, C. N., JAIYEOLA, C.,  
717 ZHAO, Z., LUBY-PHELPS, K. & MORRISON, S. J. 2015. Deep imaging of bone marrow shows non-  
718 dividing stem cells are mainly perisinusoidal. *Nature*, 526, 126-30.
- 719 ALEXOPOULOU, L., HOLT, A. C., MEDZHITOV, R. & FLAVELL, R. A. 2001. Recognition of double-stranded  
720 RNA and activation of NF-kappaB by Toll-like receptor 3. *Nature*, 413, 732-8.
- 721 AVGUSTINOVA, A. & BENITAH, S. A. 2016. Epigenetic control of adult stem cell function. *Nat Rev Mol Cell*  
722 *Biol*, 17, 643-58.
- 723 BALAZS, A. B., FABIAN, A. J., ESMON, C. T. & MULLIGAN, R. C. 2006. Endothelial protein C receptor (CD201)  
724 explicitly identifies hematopoietic stem cells in murine bone marrow. *Blood*, 107, 2317-21.
- 725 BECHT, E., MCINNES, L., HEALY, J., DUTERTRE, C. A., KWOK, I. W. H., NG, L. G., GINHOUX, F. & NEWELL, E.  
726 W. 2018. Dimensionality reduction for visualizing single-cell data using UMAP. *Nat Biotechnol*.
- 727 BENDALL, L. J. & BRADSTOCK, K. F. 2014. G-CSF: From granulopoietic stimulant to bone marrow stem cell  
728 mobilizing agent. *Cytokine Growth Factor Rev*, 25, 355-67.
- 729 BLAU, H. M. & DALEY, G. Q. 2019. Stem Cells in the Treatment of Disease. *N Engl J Med*, 380, 1748-1760.
- 730 BUENROSTRO, J. D., CORCES, M. R., LAREAU, C. A., WU, B., SCHEP, A. N., ARYEE, M. J., MAJETI, R., CHANG,  
731 H. Y. & GREENLEAF, W. J. 2018. Integrated Single-Cell Analysis Maps the Continuous Regulatory  
732 Landscape of Human Hematopoietic Differentiation. *Cell*, 173, 1535-1548 e16.
- 733 CABEZAS-WALLSCHEID, N., BUETTNER, F., SOMMERKAMP, P., KLIMMECK, D., LADEL, L., THALHEIMER, F.  
734 B., PASTOR-FLORES, D., ROMA, L. P., RENDERS, S., ZEISBERGER, P., PRZYBYLLA, A., SCHONBERGER,  
735 K., SCOGNAMIGLIO, R., ALTAMURA, S., FLORIAN, C. M., FAWAZ, M., VONFICHT, D., TESIO, M.,  
736 COLLIER, P., PAVLINIC, D., GEIGER, H., SCHROEDER, T., BENES, V., DICK, T. P., RIEGER, M. A.,  
737 STEGLE, O. & TRUMPP, A. 2017. Vitamin A-Retinoic Acid Signaling Regulates Hematopoietic Stem  
738 Cell Dormancy. *Cell*, 169, 807-823 e19.
- 739 CABEZAS-WALLSCHEID, N., KLIMMECK, D., HANSSON, J., LIPKA, D. B., REYES, A., WANG, Q., WEICHENHAN,  
740 D., LIER, A., VON PALESKE, L., RENDERS, S., WUNSCH, P., ZEISBERGER, P., BROCKS, D., GU, L.,  
741 HERRMANN, C., HAAS, S., ESSERS, M. A. G., BRORS, B., EILS, R., HUBER, W., MILSOM, M. D., PLASS,  
742 C., KRIJGSVELD, J. & TRUMPP, A. 2014. Identification of regulatory networks in HSCs and their  
743 immediate progeny via integrated proteome, transcriptome, and DNA methylome analysis. *Cell*  
744 *Stem Cell*, 15, 507-522.
- 745 CHEN, J. Y., MIYANISHI, M., WANG, S. K., YAMAZAKI, S., SINHA, R., KAO, K. S., SEITA, J., SAHOO, D.,  
746 NAKAUCHI, H. & WEISSMAN, I. L. 2016. Hoxb5 marks long-term haematopoietic stem cells and  
747 reveals a homogenous perivascular niche. *Nature*, 530, 223-7.
- 748 CHOUDHURI, A., TROMPOUKI, E., ABRAHAM, B. J., COLLI, L. M., KOCK, K. H., MALLARD, W., YANG, M. L.,  
749 VINJAMUR, D. S., GHAMARI, A., SPORRIJ, A., HOI, K., HUMMEL, B., BOATMAN, S., CHAN, V., TSENG,  
750 S., NANDAKUMAR, S. K., YANG, S., LICHTIG, A., SUPERDOCK, M., GRIMES, S. N., BOWMAN, T. V.,  
751 ZHOU, Y., TAKAHASHI, S., JOEHANES, R., CANTOR, A. B., BAUER, D. E., GANESH, S. K., RINN, J.,  
752 ALBERT, P. S., BULYK, M. L., CHANOCK, S. J., YOUNG, R. A. & ZON, L. I. 2020. Common variants in  
753 signaling transcription-factor-binding sites drive phenotypic variability in red blood cell traits. *Nat*  
754 *Genet*.
- 755 CURRY, S. H., BROWN, E. A., KUCK, H. & CASSIN, S. 1982. Preparation and stability of indomethacin  
756 solutions. *Can J Physiol Pharmacol*, 60, 988-92.
- 757 EMA, H., MORITA, Y., YAMAZAKI, S., MATSUBARA, A., SEITA, J., TADOKORO, Y., KONDO, H., TAKANO, H. &  
758 NAKAUCHI, H. 2006. Adult mouse hematopoietic stem cells: purification and single-cell assays.  
759 *Nat Protoc*, 1, 2979-87.



- 760 EYLES, J. L., HICKEY, M. J., NORMAN, M. U., CROKER, B. A., ROBERTS, A. W., DRAKE, S. F., JAMES, W. G.,  
761 METCALF, D., CAMPBELL, I. K. & WICKS, I. P. 2008. A key role for G-CSF-induced neutrophil  
762 production and trafficking during inflammatory arthritis. *Blood*, 112, 5193-201.
- 763 FARBEHI, N., PATRICK, R., DORISON, A., XAYMARDAN, M., JANBANDHU, V., WYSTUB-LIS, K., HO, J. W.,  
764 NORDON, R. E. & HARVEY, R. P. 2019. Single-cell expression profiling reveals dynamic flux of  
765 cardiac stromal, vascular and immune cells in health and injury. *Elife*, 8.
- 766 FINAK, G., MCDAVID, A., YAJIMA, M., DENG, J., GERSUK, V., SHALEK, A. K., SLICHTER, C. K., MILLER, H. W.,  
767 MCEL RATH, M. J., PRLIC, M., LINSLEY, P. S. & GOTTARDO, R. 2015. MAST: a flexible statistical  
768 framework for assessing transcriptional changes and characterizing heterogeneity in single-cell  
769 RNA sequencing data. *Genome Biol*, 16, 278.
- 770 FOU DI, A., HOCHEDLINGER, K., VAN BUREN, D., SCHINDLER, J. W., JAENISCH, R., CAREY, V. & HOCK, H.  
771 2009. Analysis of histone 2B-GFP retention reveals slowly cycling hematopoietic stem cells. *Nat*  
772 *Biotechnol*, 27, 84-90.
- 773 GAL-OZ, S. T., MAIER, B., YOSHIDA, H., SEDDU, K., ELBAZ, N., CZYSZ, C., ZUK, O., STRANGER, B. E., NER-  
774 GAON, H. & SHAY, T. 2019. ImmGen report: sexual dimorphism in the immune system  
775 transcriptome. *Nat Commun*, 10, 4295.
- 776 GAUBLomme, J. T., LI, B., MCCABE, C., KNECHT, A., YANG, Y., DROKHLYANSKY, E., VAN WITTENBERGHE,  
777 N., WALDMAN, J., DIONNE, D., NGUYEN, L., DE JAGER, P. L., YEUNG, B., ZHAO, X., HABIB, N.,  
778 ROZENBLATT-ROSEN, O. & REGEV, A. 2019. Nuclei multiplexing with barcoded antibodies for  
779 single-nucleus genomics. *Nat Commun*, 10, 2907.
- 780 GAZIT, R., MANDAL, P. K., EBINA, W., BEN-ZVI, A., NOMBELA-ARRIETA, C., SILBERSTEIN, L. E. & ROSSI, D. J.  
781 2014. Fgd5 identifies hematopoietic stem cells in the murine bone marrow. *J Exp Med*, 211, 1315-  
782 31.
- 783 HAAS, S., TRUMPP, A. & MILSOM, M. D. 2018. Causes and Consequences of Hematopoietic Stem Cell  
784 Heterogeneity. *Cell Stem Cell*, 22, 627-638.
- 785 HAGHVERDI, L., BUTTNER, M., WOLF, F. A., BUETTNER, F. & THEIS, F. J. 2016. Diffusion pseudotime  
786 robustly reconstructs lineage branching. *Nat Methods*, 13, 845-8.
- 787 HIE, B., BRYSON, B. & BERGER, B. 2019. Efficient integration of heterogeneous single-cell transcriptomes  
788 using Scanorama. *Nat Biotechnol*, 37, 685-691.
- 789 HOGGATT, J., SINGH, P., STILGER, K. N., PLETT, P. A., SAMPSON, C. H., CHUA, H. L., ORSCHELL, C. M. &  
790 PELUS, L. M. 2013. Recovery from hematopoietic injury by modulating prostaglandin E(2) signaling  
791 post-irradiation. *Blood Cells Mol Dis*, 50, 147-53.
- 792 HU, Y. & SMYTH, G. K. 2009. ELDA: extreme limiting dilution analysis for comparing depleted and enriched  
793 populations in stem cell and other assays. *J Immunol Methods*, 347, 70-8.
- 794 JOHNSON, W. E., LI, C. & RABINOVIC, A. 2007. Adjusting batch effects in microarray expression data using  
795 empirical Bayes methods. *Biostatistics*, 8, 118-27.
- 796 KLEMM, S. L., SHIPONY, Z. & GREENLEAF, W. J. 2019. Chromatin accessibility and the regulatory  
797 epigenome. *Nat Rev Genet*, 20, 207-220.
- 798 LARA-ASTIASO, D., WEINER, A., LORENZO-VIVAS, E., ZARETSKY, I., JAITIN, D. A., DAVID, E., KEREN-SHAUL,  
799 H., MILDNER, A., WINTER, D., JUNG, S., FRIEDMAN, N. & AMIT, I. 2014. Immunogenetics.  
800 Chromatin state dynamics during blood formation. *Science*, 345, 943-9.
- 801 LAREAU, C. A., DUARTE, F. M., CHEW, J. G., KARTHA, V. K., BURKETT, Z. D., KOHLWAY, A. S., POKHOLOK,  
802 D., ARYEE, M. J., STEEMERS, F. J., LEBOSKY, R. & BUENROSTRO, J. D. 2019. Droplet-based  
803 combinatorial indexing for massive-scale single-cell chromatin accessibility. *Nat Biotechnol*, 37,  
804 916-924.
- 805 LEUNG, K. T., CHAN, K. Y., NG, P. C., LAU, T. K., CHIU, W. M., TSANG, K. S., LI, C. K., KONG, C. K. & LI, K.  
806 2011. The tetraspanin CD9 regulates migration, adhesion, and homing of human cord blood  
807 CD34+ hematopoietic stem and progenitor cells. *Blood*, 117, 1840-50.

- 808 LUAN, B., YOON, Y. S., LE LAY, J., KAESTNER, K. H., HEDRICK, S. & MONTMINY, M. 2015. CREB pathway  
809 links PGE2 signaling with macrophage polarization. *Proc Natl Acad Sci U S A*, 112, 15642-7.
- 810 LUECKEN, M. D. & THEIS, F. J. 2019. Current best practices in single-cell RNA-seq analysis: a tutorial. *Mol*  
811 *Syst Biol*, 15, e8746.
- 812 METCALF, D. & NICOLA, N. A. 1983. Proliferative effects of purified granulocyte colony-stimulating factor  
813 (G-CSF) on normal mouse hemopoietic cells. *J Cell Physiol*, 116, 198-206.
- 814 MORALES-MANTILLA, D. E. & KING, K. Y. 2018. The Role of Interferon-Gamma in Hematopoietic Stem Cell  
815 Development, Homeostasis, and Disease. *Curr Stem Cell Rep*, 4, 264-271.
- 816 MORRISON, S. J. & SCADDEN, D. T. 2014. The bone marrow niche for haematopoietic stem cells. *Nature*,  
817 505, 327-34.
- 818 MORRISON, S. J. & SPRADLING, A. C. 2008. Stem cells and niches: mechanisms that promote stem cell  
819 maintenance throughout life. *Cell*, 132, 598-611.
- 820 MORRISON, S. J., WANDYDZ, A. M., AKASHI, K., GLOBERSON, A. & WEISSMAN, I. L. 1996. The aging of  
821 hematopoietic stem cells. *Nat Med*, 2, 1011-6.
- 822 MORRISON, S. J., WRIGHT, D. E. & WEISSMAN, I. L. 1997. Cyclophosphamide/granulocyte colony-  
823 stimulating factor induces hematopoietic stem cells to proliferate prior to mobilization. *Proc Natl*  
824 *Acad Sci U S A*, 94, 1908-13.
- 825 NAKADA, D., OGURO, H., LEVI, B. P., RYAN, N., KITANO, A., SAITOH, Y., TAKEICHI, M., WENDT, G. R. &  
826 MORRISON, S. J. 2014. Oestrogen increases haematopoietic stem-cell self-renewal in females and  
827 during pregnancy. *Nature*, 505, 555-8.
- 828 NEGISHI, H., TANIGUCHI, T. & YANAI, H. 2018. The Interferon (IFN) Class of Cytokines and the IFN  
829 Regulatory Factor (IRF) Transcription Factor Family. *Cold Spring Harb Perspect Biol*, 10.
- 830 OGURO, H., DING, L. & MORRISON, S. J. 2013. SLAM family markers resolve functionally distinct  
831 subpopulations of hematopoietic stem cells and multipotent progenitors. *Cell Stem Cell*, 13, 102-  
832 16.
- 833 PATTERSON, A. M., LIU, L., SAMPSON, C. H., PLETT, P. A., LI, H., SINGH, P., MOHAMMAD, K. S., HOGGATT,  
834 J., CAPITANO, M. L., ORSCHELL, C. M. & PELUS, L. M. 2020. A Single Radioprotective Dose of  
835 Prostaglandin E2 Blocks Irradiation-Induced Apoptotic Signaling and Early Cycling of  
836 Hematopoietic Stem Cells. *Stem Cell Reports*, 15, 358-373.
- 837 PIETRAS, E. M., LAKSHMINARASIMHAN, R., TECHNER, J. M., FONG, S., FLACH, J., BINNEWIES, M. &  
838 PASSEGUE, E. 2014. Re-entry into quiescence protects hematopoietic stem cells from the killing  
839 effect of chronic exposure to type I interferons. *J Exp Med*, 211, 245-62.
- 840 PIETRAS, E. M., MIRANTES-BARBEITO, C., FONG, S., LOEFFLER, D., KOVTONYUK, L. V., ZHANG, S.,  
841 LAKSHMINARASIMHAN, R., CHIN, C. P., TECHNER, J. M., WILL, B., NERLOV, C., STEIDL, U., MANZ,  
842 M. G., SCHROEDER, T. & PASSEGUE, E. 2016. Chronic interleukin-1 exposure drives  
843 haematopoietic stem cells towards precocious myeloid differentiation at the expense of self-  
844 renewal. *Nat Cell Biol*, 18, 607-18.
- 845 PIETRAS, E. M., REYNAUD, D., KANG, Y. A., CARLIN, D., CALERO-NIETO, F. J., LEAVITT, A. D., STUART, J. M.,  
846 GOTTGENS, B. & PASSEGUE, E. 2015. Functionally Distinct Subsets of Lineage-Biased Multipotent  
847 Progenitors Control Blood Production in Normal and Regenerative Conditions. *Cell Stem Cell*, 17,  
848 35-46.
- 849 PINHO, S. & FRENETTE, P. S. 2019. Haematopoietic stem cell activity and interactions with the niche. *Nat*  
850 *Rev Mol Cell Biol*, 20, 303-320.
- 851 PORTER, R. L., GEORGER, M. A., BROMBERG, O., MCGRATH, K. E., FRISCH, B. J., BECKER, M. W. & CALVI, L.  
852 M. 2013. Prostaglandin E2 increases hematopoietic stem cell survival and accelerates  
853 hematopoietic recovery after radiation injury. *Stem Cells*, 31, 372-83.

- 854 PRATICO, D., TILLMANN, C., ZHANG, Z. B., LI, H. & FITZGERALD, G. A. 2001. Acceleration of atherogenesis  
855 by COX-1-dependent prostanoid formation in low density lipoprotein receptor knockout mice.  
856 *Proc Natl Acad Sci U S A*, 98, 3358-63.
- 857 QIU, J., PAPATSENKO, D., NIU, X., SCHANIEL, C. & MOORE, K. 2014. Divisional history and hematopoietic  
858 stem cell function during homeostasis. *Stem Cell Reports*, 2, 473-90.
- 859 RODRIGUEZ-FRATICELLI, A. E., WEINREB, C., WANG, S. W., MIGUELES, R. P., JANKOVIC, M., USART, M.,  
860 KLEIN, A. M., LOWELL, S. & CAMARGO, F. D. 2020. Single-cell lineage tracing unveils a role for  
861 TCF15 in haematopoiesis. *Nature*, 583, 585-589.
- 862 RODRIQUES, S. G., STICKELS, R. R., GOEVA, A., MARTIN, C. A., MURRAY, E., VANDERBURG, C. R., WELCH,  
863 J., CHEN, L. M., CHEN, F. & MACOSKO, E. Z. 2019. Slide-seq: A scalable technology for measuring  
864 genome-wide expression at high spatial resolution. *Science*, 363, 1463-1467.
- 865 SCHEP, A. N., WU, B., BUENROSTRO, J. D. & GREENLEAF, W. J. 2017. chromVAR: inferring transcription-  
866 factor-associated accessibility from single-cell epigenomic data. *Nat Methods*, 14, 975-978.
- 867 SHEEHAN, K. C., LAZEAR, H. M., DIAMOND, M. S. & SCHREIBER, R. D. 2015. Selective Blockade of  
868 Interferon-alpha and -beta Reveals Their Non-Redundant Functions in a Mouse Model of West  
869 Nile Virus Infection. *PLoS One*, 10, e0128636.
- 870 SMILLIE, C. S., BITON, M., ORDOVAS-MONTANES, J., SULLIVAN, K. M., BURGIN, G., GRAHAM, D. B., HERBST,  
871 R. H., ROGEL, N., SLYPER, M., WALDMAN, J., SUD, M., ANDREWS, E., VELONIAS, G., HABER, A. L.,  
872 JAGADEESH, K., VICKOVIC, S., YAO, J., STEVENS, C., DIONNE, D., NGUYEN, L. T., VILLANI, A. C.,  
873 HOFREE, M., CREASEY, E. A., HUANG, H., ROZENBLATT-ROSEN, O., GARBER, J. J., KHALILI, H.,  
874 DESCH, A. N., DALY, M. J., ANANTHAKRISHNAN, A. N., SHALEK, A. K., XAVIER, R. J. & REGEV, A.  
875 2019. Intra- and Inter-cellular Rewiring of the Human Colon during Ulcerative Colitis. *Cell*, 178,  
876 714-730 e22.
- 877 SPEIR, M. L., BHADURI, A., MARKOV, N. S., MORENO, P., NOWAKOWSKI, T. J., PAPTAEODOROU, I.,  
878 POLLEN, A. A., SENINGE, L., KENT, W. J. & HAEUSSLER, M. 2020. UCSC Cell Browser: Visualize Your  
879 Single-Cell Data. *bioRxiv*, 2020.10.30.361162.
- 880 STOECKIUS, M., ZHENG, S., HOUCK-LOOMIS, B., HAO, S., YEUNG, B. Z., MAUCK, W. M., 3RD, SMIBERT, P.  
881 & SATIJA, R. 2018. Cell Hashing with barcoded antibodies enables multiplexing and doublet  
882 detection for single cell genomics. *Genome Biol*, 19, 224.
- 883 STUART, T., BUTLER, A., HOFFMAN, P., HAFEMEISTER, C., PAPALEXI, E., MAUCK, W. M., 3RD, HAO, Y.,  
884 STOECKIUS, M., SMIBERT, P. & SATIJA, R. 2019. Comprehensive Integration of Single-Cell Data.  
885 *Cell*, 177, 1888-1902 e21.
- 886 SUN, B., MALLAMPATI, S., GONG, Y., WANG, D., LEFEBVRE, V. & SUN, X. 2013. Sox4 is required for the  
887 survival of pro-B cells. *J Immunol*, 190, 2080-9.
- 888 TRAAG, V. A., WALTMAN, L. & VAN ECK, N. J. 2019. From Louvain to Leiden: guaranteeing well-connected  
889 communities. *Sci Rep*, 9, 5233.
- 890 TROMPOUKI, E., BOWMAN, T. V., LAWTON, L. N., FAN, Z. P., WU, D. C., DIBIASE, A., MARTIN, C. S., CECH,  
891 J. N., SESSA, A. K., LEBLANC, J. L., LI, P., DURAND, E. M., MOSIMANN, C., HEFFNER, G. C., DALEY,  
892 G. Q., PAULSON, R. F., YOUNG, R. A. & ZON, L. I. 2011. Lineage regulators direct BMP and Wnt  
893 pathways to cell-specific programs during differentiation and regeneration. *Cell*, 147, 577-89.
- 894 WILSON, A., LAURENTI, E., OSER, G., VAN DER WATH, R. C., BLANCO-BOSE, W., JAWORSKI, M., OFFNER,  
895 S., DUNANT, C. F., ESHKIND, L., BOCKAMP, E., LIO, P., MACDONALD, H. R. & TRUMPP, A. 2008.  
896 Hematopoietic stem cells reversibly switch from dormancy to self-renewal during homeostasis  
897 and repair. *Cell*, 135, 1118-29.
- 898 WILSON, N. K., KENT, D. G., BUETTNER, F., SHEHATA, M., MACAULAY, I. C., CALERO-NIETO, F. J., SANCHEZ  
899 CASTILLO, M., OEDEKOVEN, C. A., DIAMANTI, E., SCHULTE, R., PONTING, C. P., VOET, T., CALDAS,  
900 C., STINGL, J., GREEN, A. R., THEIS, F. J. & GOTTGENS, B. 2015. Combined Single-Cell Functional

901                   and Gene Expression Analysis Resolves Heterogeneity within Stem Cell Populations. *Cell Stem Cell*,  
902                   16, 712-24.  
903   WOLF, F. A., ANGERER, P. & THEIS, F. J. 2018. SCANPY: large-scale single-cell gene expression data analysis.  
904                   *Genome Biol*, 19, 15.  
905   YU, X., WU, C., BHAVANASI, D., WANG, H., GREGORY, B. D. & HUANG, J. 2017. Chromatin dynamics during  
906                   the differentiation of long-term hematopoietic stem cells to multipotent progenitors. *Blood Adv*,  
907                   1, 887-898.  
908   ZHAO, J. L., MA, C., O'CONNELL, R. M., MEHTA, A., DILORETO, R., HEATH, J. R. & BALTIMORE, D. 2014.  
909                   Conversion of danger signals into cytokine signals by hematopoietic stem and progenitor cells for  
910                   regulation of stress-induced hematopoiesis. *Cell Stem Cell*, 14, 445-459.  
911   ZON, L. I. 2008. Intrinsic and extrinsic control of haematopoietic stem-cell self-renewal. *Nature*, 453, 306-  
912                   13.  
913   ZOU, F., WANG, X., HAN, X., ROTHSCHILD, G., ZHENG, S. G., BASU, U. & SUN, J. 2018. Expression and  
914                   Function of Tetraspanins and Their Interacting Partners in B Cells. *Front Immunol*, 9, 1606.  
915  
916

917 **Figure legends**

918

919 **Figure 1: HSCs are transcriptionally heterogeneous and niche perturbations rapidly shift**  
920 **cells into different states**

921 (A) Schematic of stimulant treatment before HSC and MPP isolation. (B) UMAP plot of HSC  
922 clusters (n = 15 355 cells) (C) UMAP plot with expression of representative genes for each  
923 cluster. (D) Dot plot of enriched genes for each HSC cluster (scaled expression across  
924 columns). (E) UMAP density graphs of HSC distribution upon each niche stimulant (F)  
925 Proportion of HSCs within clusters for each niche perturbation. (G) Proportion of HSCs from  
926 each niche perturbation within a cluster normalized for total cell number per treatment.

927

928 **Figure 2: MPP surface marker validated LSK clusters respond similarly to drug**  
929 **treatments like HSCs**

930 (A) UMAP plot of LSK clustering (n = 8191 cells). (B) UMAP plot of surface receptor phenotypes  
931 in LSK cells. (C) Stacked violin plots of gene expression for surface markers within MPPs and  
932 HSCs. (D) Dot plot of enriched genes for each LSK cluster (scaled expression across columns).  
933 (E) Proportion of LSK cells within clusters for each niche perturbation. (F) Proportion of LSK  
934 cells belonging to different clusters for each surface phenotype. (G) Proportion of LSK cells from  
935 each niche perturbation within a cluster normalized for total cell number per treatment. (H)  
936 Proportion of surface phenotypes within each LSK cluster.

937

938 **Figure 3: LSK and HSC cluster-specific differential gene expression analysis reveals**  
939 **novel, specific effects on HSC and LSK subpopulations**

940 (A-D) Stacked bar graphs with proportion of differentially expressed genes that are unique for  
941 HSCs (purple) MPPs (green) or overlapping (grey) for G-CSF (A), Poly(I:C) (B), Indo (C) and  
942 dmPGE<sub>2</sub> (D) treatment. Below each bar graph the total number of differentially expressed genes  
943 ('Genes #') for each fold-change ('Cutoff') is listed. (E-F) Violinplots of receptor expression in  
944 control HSCs (E) and LSKs (F) split by cluster. (G) Upsetplot visualizing differentially expressed  
945 genes between dmPGE<sub>2</sub> and control for each cluster (horizontal bars) and intersection of gene  
946 sets between clusters (vertical bars) indicated by dots. Red bar and dot indicate specific genes  
947 in the Cell cycle cluster. (H) Upsetplot visualizing differentially expressed genes between  
948 dmPGE<sub>2</sub> and control for each MPP surface phenotype. Red bar indicates genes that are absent  
949 from any of the conditions (MPP, MPP1, MPP 2, MPP3/4). (I) Dot plot of representative cell  
950 cycle genes and expression in LSK clusters in control and dmPGE<sub>2</sub>. (J) Dot plot of

951 representative genes from Poly(I:C) treated and control HSC clusters (scaled expression across  
952 columns). (K) Dot plot of representative genes from the G-CSF treated and control HSC clusters  
953 (scaled expression across columns).

954

955 **Figure 4: Indomethacin treatment induces change in IEG transcriptional state in HSCs**

956 (A-H) Diffusion pseudotime analysis. UMAP plot of *Fos* expression in control (A) and upon  
957 indomethacin (B) treatment. Diffusion map embedding with combined expression of activated  
958 genes to select root cell (C) and cells colored by pseudotime (D). Kernel density of cell  
959 pseudotime distribution comparing indomethacin and control (E) and G-CSF and control (F).  
960 Average expression of *Fos* (G) and *Ly6a* (H) across cells ranked by pseudotime (cells split into  
961 10 bins to decrease noise), change in transcript levels indicated by asterisk in G. (I) Histogram  
962 of FOS levels via intracellular FACS of HSCs, 'no stain' is FACS negative control, 'control' is  
963 FOS in untreated mice. (J) Normalized mean fluorescence intensity (MFI) for FOS in control and  
964 indomethacin treated HSCs ( $p = 6.2 * 10^{-3}$ , Welch corrected t-test) and LSK cells ( $p = 6.6 * 10^{-3}$ ,  
965 Welch corrected t-test) across two independent biological replicate experiments. n (mice) = 20.

966

967 **Figure 5: Specific transcription factor binding motif cooccurrences in HSCs**

968 (A) Schematic of downstream transcriptional signaling pathways for niche stimulants. (B-D)  
969 UMAP plot of HSC scATAC-Seq clusters (n = 730 cells) (B) and ISRE (C) or AP-1 (D) TF motif  
970 scores. (E-F) UMAP plot of LSKs (n = 10750 cells) colored by surface phenotype (E) and  
971 scATAC-Seq clusters (F). (G-H) Violin plots of TF motif scores enriched in HSC cluster 1 in  
972 HSCs (G) and LSKs (H). (I-J) Violin plots of TF motif scores enriched in HSC cluster 0 in HSCs  
973 (I) and LSKs (J).

974

975 **Supplemental Figure legends**

976

977 **Supplemental Figure 1: Functional characterization of HSC populations confirms high**  
978 **regenerative capacity**

979 (A) Sorting scheme of MPPs and HSCs. Cells were lineage depleted prior to sort. (B) Schematic  
980 of limit dilution transplant experiment. (C) Chimerism per mouse and lineage distribution 4  
981 months post-transplant. (D) Limit dilution analysis for transplant experiment. (E) Cell cycle  
982 FACS in MPP and HSC populations. (F) Percentage of MPPs and HSCs within LSK cells at  
983 baseline and after niche stimulation. (G) Proportion of each surface phenotype within all five  
984 experimental conditions after computational reassembly of the LSK compartment.

985

986 **Supplementary Figure 2: Validation of single cell RNA-Seq clustering with independent**  
987 **replicates, pathway enrichment and candidate genes**

988 (A-D) Comparison of clustering of control HSCs in two biological replicates. UMAP plots for  
989 replicate 1 (A, n = 2382 cells) and 2 (B, n = 5334 cells) and summarized cell proportions in each  
990 cluster (C). (D) Pairwise comparison of the proportion of overlap of the top 100 enriched genes  
991 for each cluster. (E) Reactome pathway analysis with enriched genes for each HSC cluster. (F)  
992 UMAP plots with expression of previously described HSC markers. (G) Proportion of dmPGE2  
993 and control cells within clusters split by surface phenotype for HSCs and MPP1s.

994

995 **Supplementary Figure 3: Little sexual dimorphism in HSCs in steady state and upon**  
996 **stimulation**

997 (A) *Xist* expression, classification of male and female cells and male and female cells plotted  
998 separately. (B) Stacked Violin plots of all consistent sexual dimorphic genes (red; female, blue;  
999 male) for two independent biological replicates. (C-D) Proportions of male and female HSCs (C)  
1000 and LSK cells (D) within clusters for each drug treatment ( $p(\text{DPA}) > 0.05$  for all male vs. female  
1001 comparisons). (E) Heat map of average expression for 'opposite directionality' genes in HSCs  
1002 for indomethacin ('Indo') and control. (F) Scatter plot of differential expression coefficient  
1003 (converted to  $\log_2$  scale) induced by stimulants in HSCs (F) and LSKs (G) between male (y-axis)  
1004 and female (x-axis). Solid red line indicates equal expression coefficients (coef female = coef  
1005 male) and dashed line indicates a two-fold deviation ( $2 \times \text{coef female} = \text{coef male}$  or vice versa).  
1006 Green arrowhead indicates 'opposite directionality' genes in indomethacin (shown also in E).  
1007

1008 **Supplemental Figure 4: Gene expression in LSKs enables evaluation of specificity of**  
1009 **niche stimulation in different cell populations**

1010 (A) Schematic of LSK pooling and CITE-Seq surface hashtag (HTO) methodology. (B) UMAP  
1011 plots with expression of selected genes in LSK cells. (C) Heat map of proportion of overlap  
1012 between the 100 top enriched genes for LSK (rows) and HSC (columns) clusters. (D) Upsetplot  
1013 visualizing differentially expressed genes between G-CSF and control for each cluster  
1014 (horizontal bars) and intersection of gene sets (vertical bars) between clusters indicated by dots.  
1015 Red bar and dot indicate specific genes in the Cell cycle cluster. (E) Upsetplot visualizing  
1016 differentially expressed genes between G-CSF and control for each MPP surface phenotype.  
1017 Red bar indicates genes that are absent from any of the conditions (MPP, MPP1, MPP 2,  
1018 MPP3/4). (F-G) UMAP density graphs visualizing the distribution of cells by surface phenotype  
1019 (F) or by niche stimulation (G).

1020

1021 **Supplemental Figure 5: Clustered heat maps of differentially expressed genes in HSCs**  
1022 **enables identification of genes and single cell clusters with similar expression patterns**

1023 (A-D) Heat map of differentially expressed genes between niche stimulants and control in  
1024 HSCs. Single cell expression is averaged within a single cell cluster, scaled to z-scores and  
1025 similar genes (rows) and clusters (columns) are aggregated by hierarchical clustering. Black row  
1026 label indicates HSC specific genes, grey label marks genes differentially expressed in both  
1027 HSCs and LSKs. (A) poly (I:C) at 1.5-fold cutoff. (B) G-CSF at 1.2-fold cutoff, (C) dmPGE<sub>2</sub> at  
1028 1.5-fold cutoff, (D) Indomethacin at 1.2-fold cutoff.

1029

1030 **Supplementary Figure 6: Clustered heat maps of differentially expressed genes in LSKs**  
1031 **enables identification of genes and single cell clusters with similar expression patterns**

1032 (A-D) Heat map of differentially expressed genes between niche stimulants and control in LSKs.  
1033 Single cell expression is averaged within a single cell cluster, scaled to z-scores and similar  
1034 genes (rows) and clusters (columns) are aggregated by hierarchical clustering. Black row label  
1035 indicates LSK specific genes, grey label marks genes differentially expressed in both HSCs and  
1036 LSKs. (A) poly (I:C) at 1.5-fold cutoff. (B) G-CSF at 1.5-fold cutoff, (C) dmPGE<sub>2</sub> at 1.5-fold  
1037 cutoff.

1038

1039 **Supplemental Figure 7: Indomethacin affects transcriptional state of IEGs**

1040 (A) UMAP plot with expression of selected 'activated' genes in control (A) and indomethacin (B).  
1041 Average expression of the same genes across cells ranked by pseudotime (cells split into 10



1042 bins to decrease noise) comparing indomethacin and control (C, difference indicated by  
1043 asterisk) or G-CSF and control (D).

1044

1045 **Supplementary Figure 8: Uniform distribution of motif activity immediately downstream**  
1046 **of niche stimulants and differential enrichment for secondary signals in HSCs and LSKs.**

1047 (A-B) UMAP plots (A) and violin plots (B) of TF motif scores immediately downstream of  
1048 Prostaglandin, Poly(I:C) and G-CSF signaling. (C-D) HSC UMAP plots of TF motif scores  
1049 enriched in HSC cluster 1 (C) and in HSC cluster 0 (D). (E-F) UMAP plot (E) and violin plot (F)  
1050 of SMAD TF motif score in HSCs. (G-H) LSK UMAP plots of TF motif scores enriched in HSC  
1051 cluster 1 (G) and in HSC cluster 0 (H). Overlapping motif activities in LSK cluster 5 are indicated  
1052 with a green arrowhead in G.

Figure 1: HSCs are transcriptionally heterogeneous and niche perturbations rapidly shift cells into different states

A

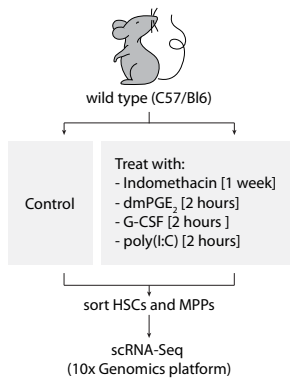

B

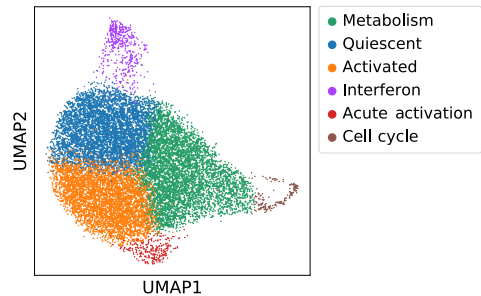

C

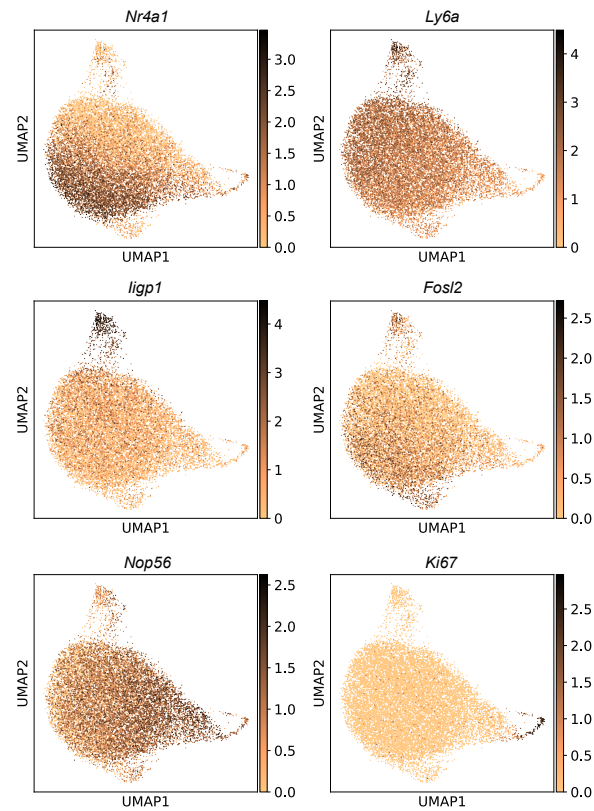

D

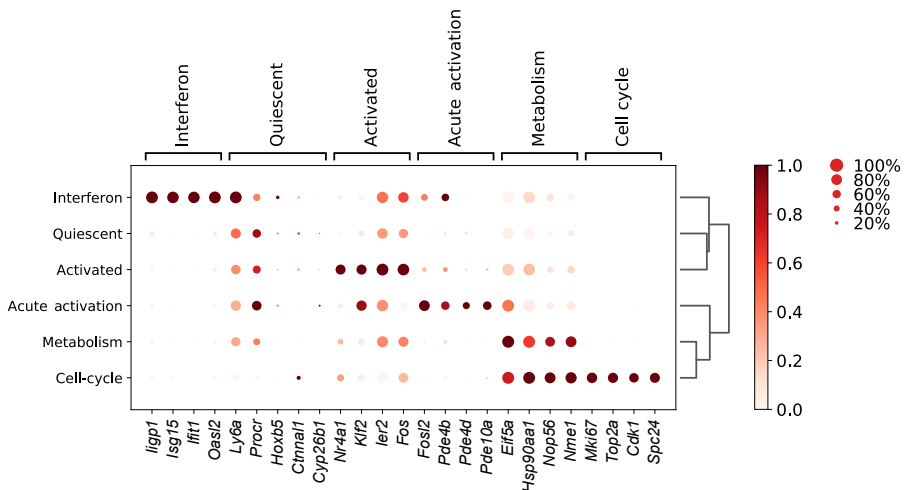

E

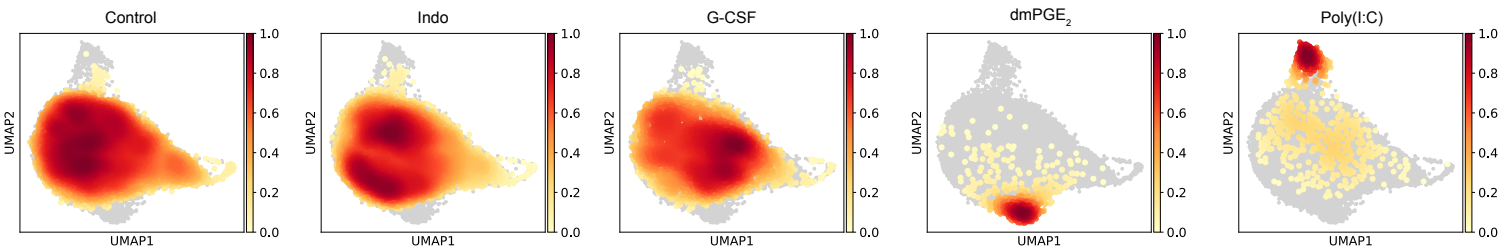

F

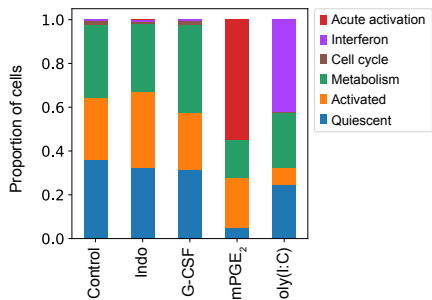

G

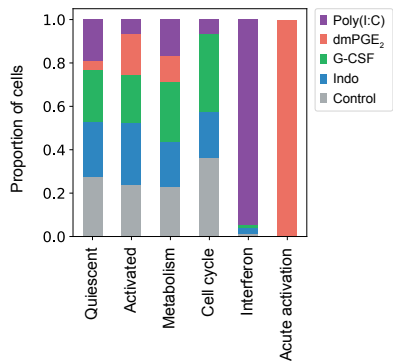

Figure 2: MPP surface marker validated LSK clusters respond similarly to drug treatments like HSCs

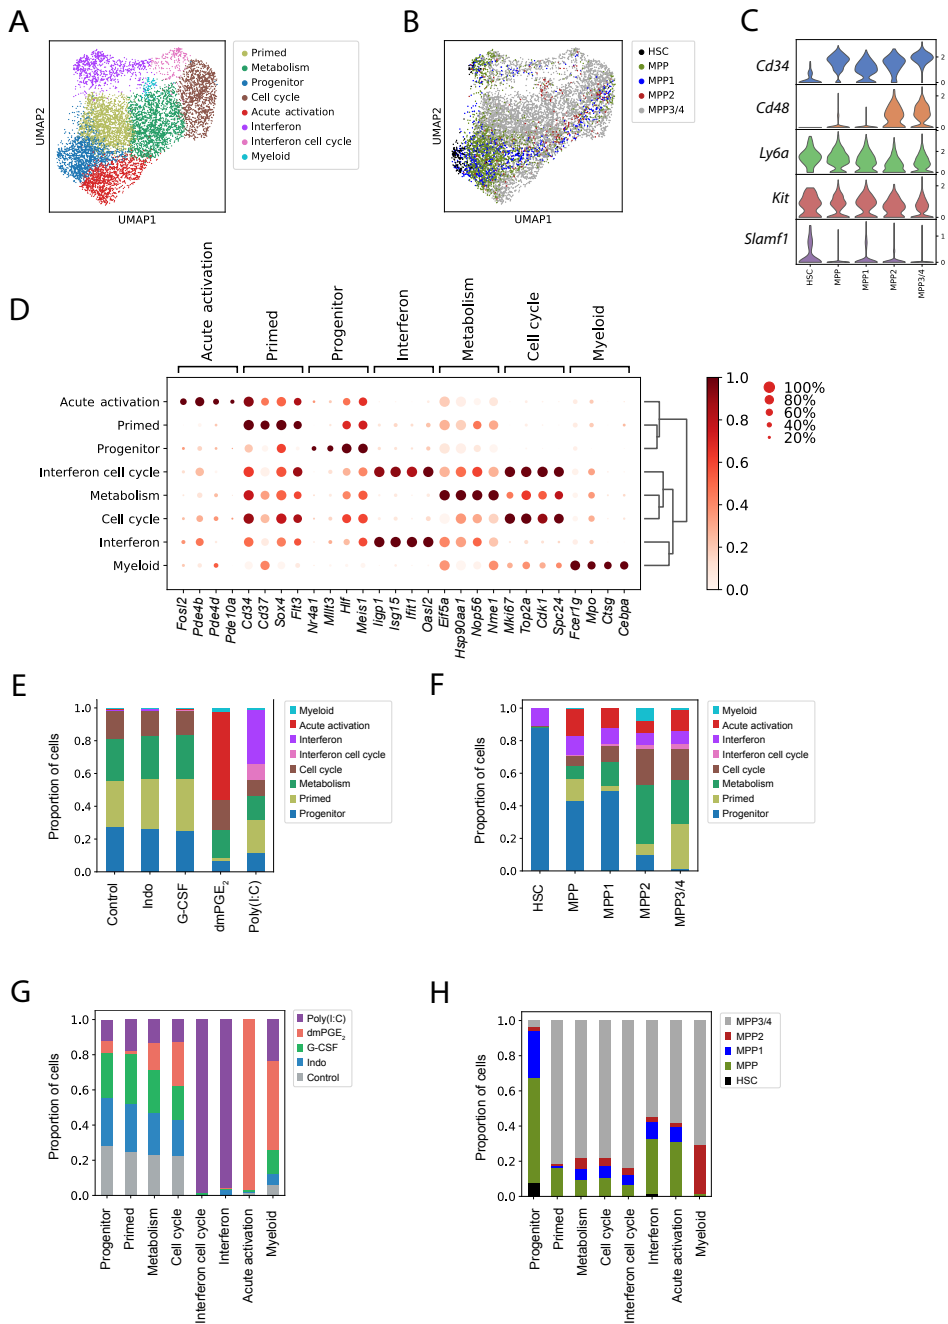

Figure 3: LSK and HSC cluster specific differential gene expression analysis reveals novel, specific effects on HSC and LSK subpopulations

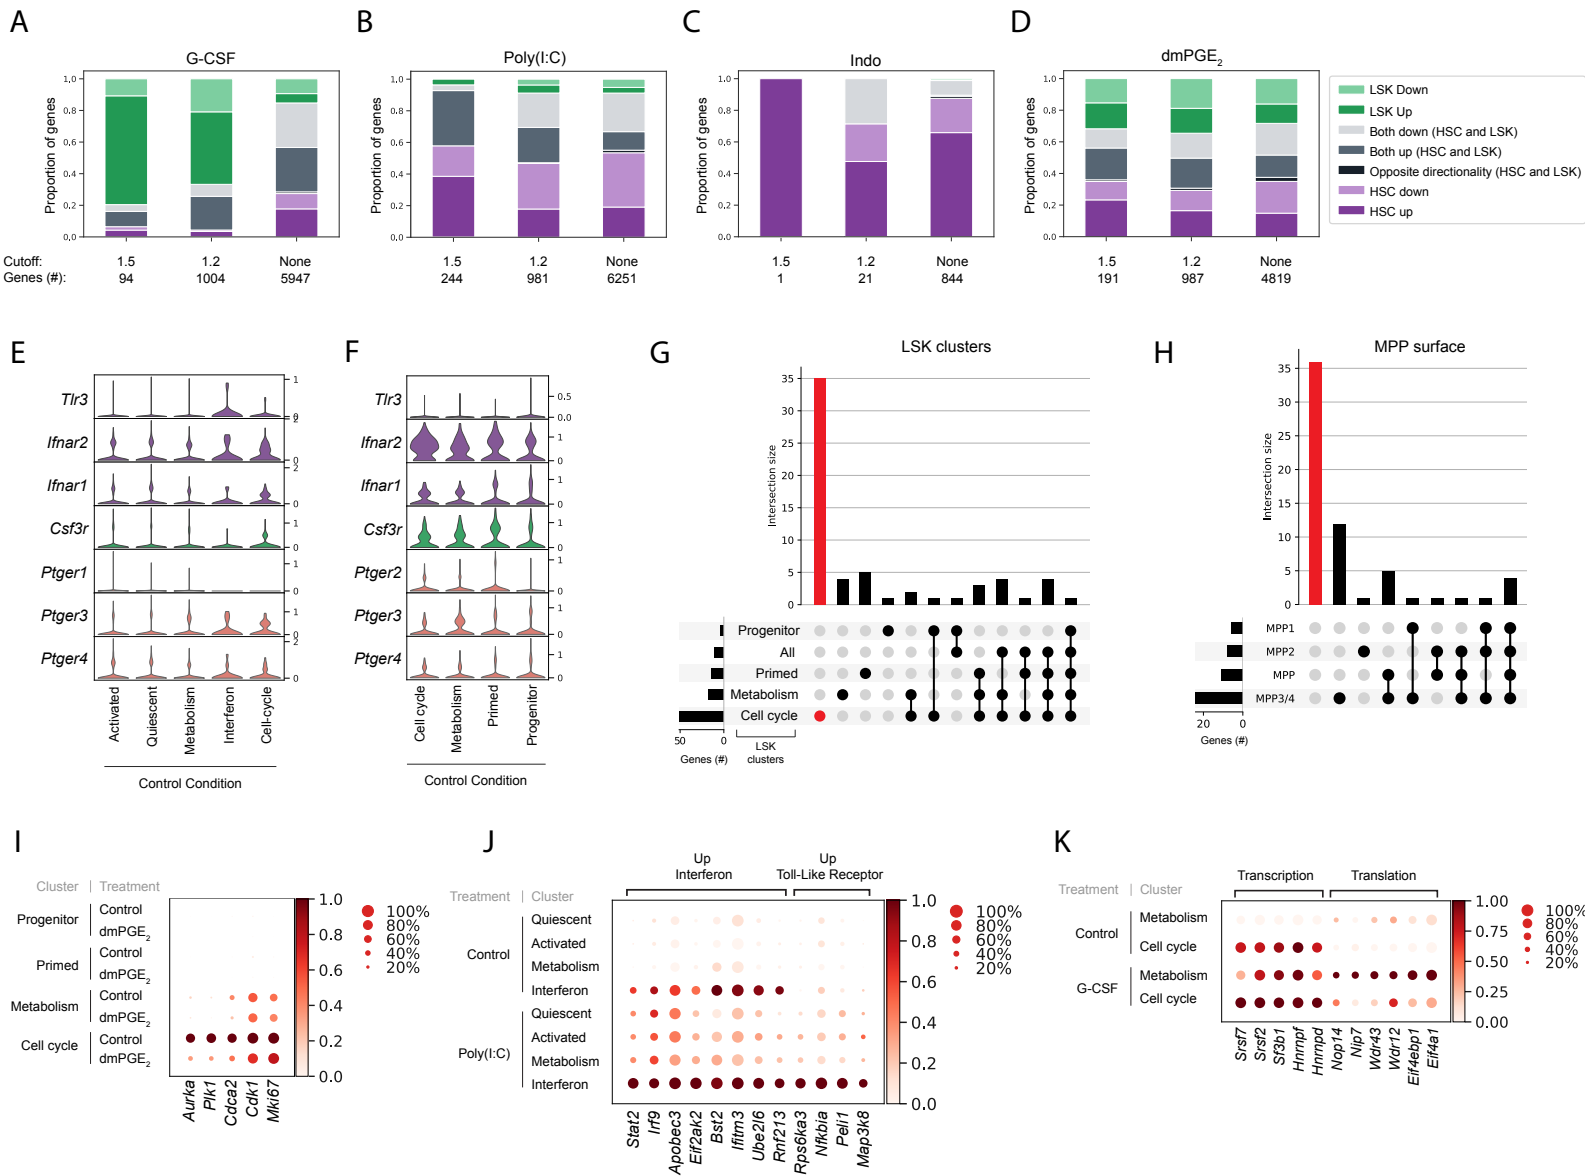

Figure 4: Indomethacin treatment induces change in IEG transcriptional state in HSCs

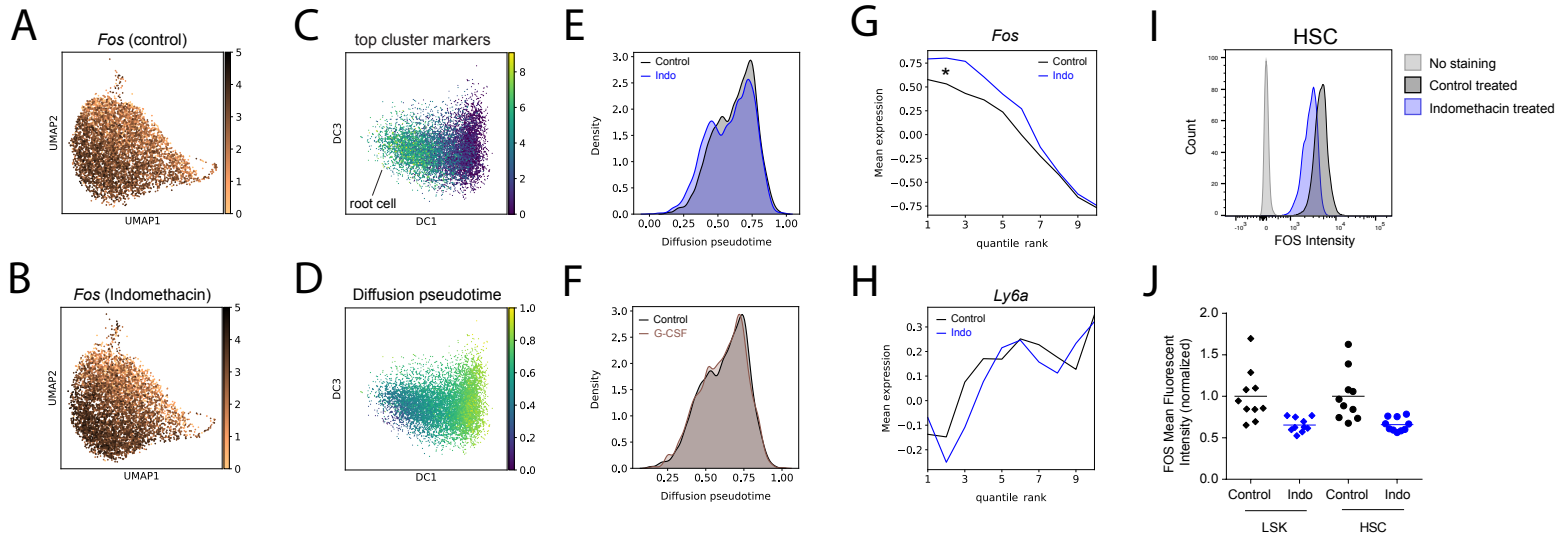

A.

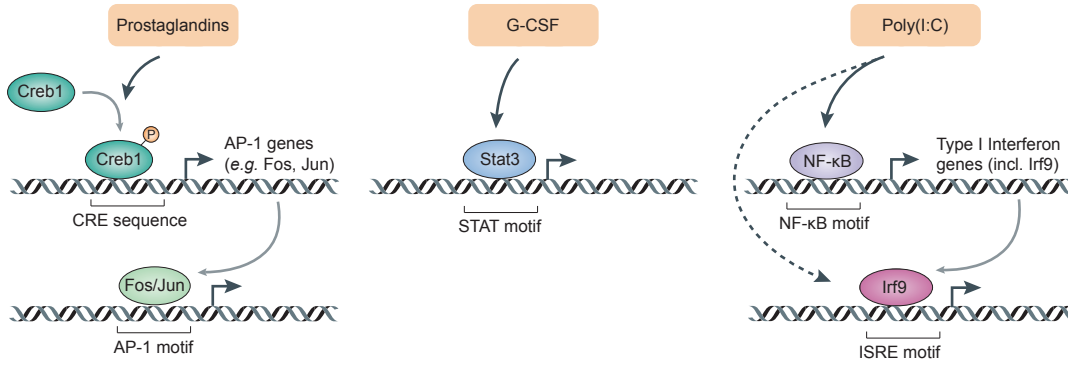

B.

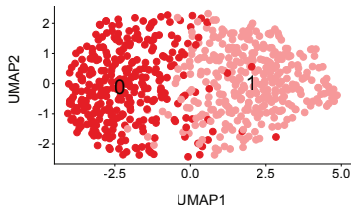

C.

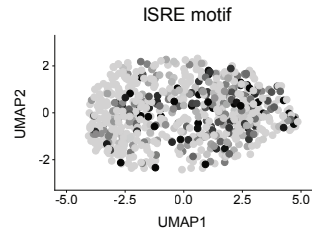

D.

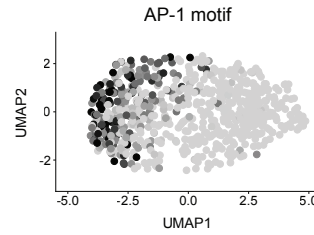

E.

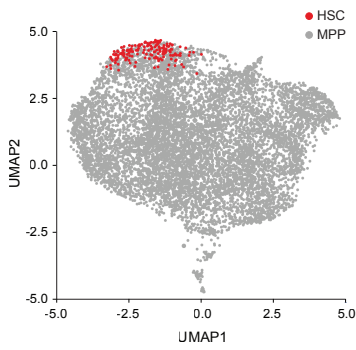

F.

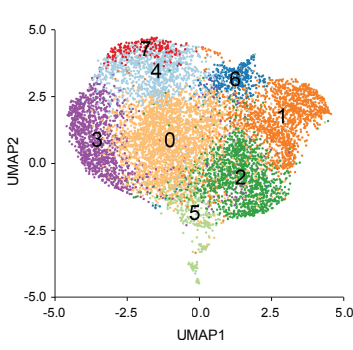

G.

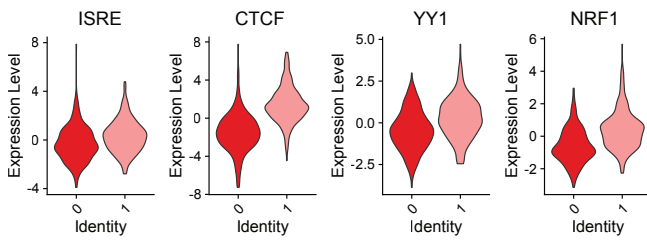

I.

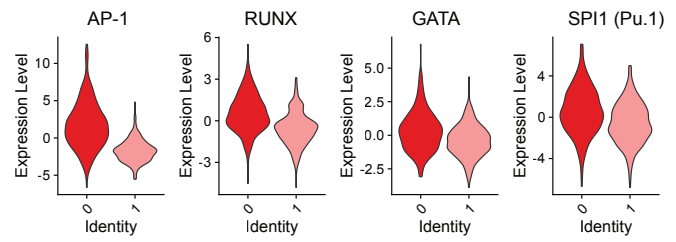

H.

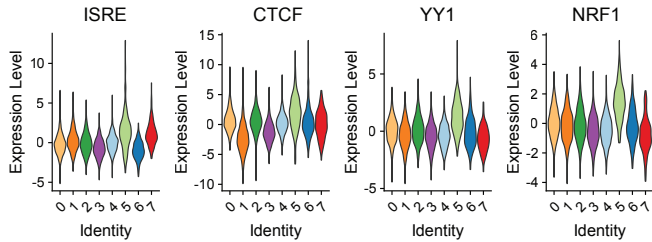

J.

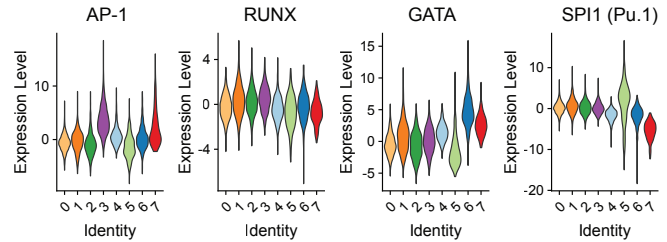

# Supplementary Figure 1

A

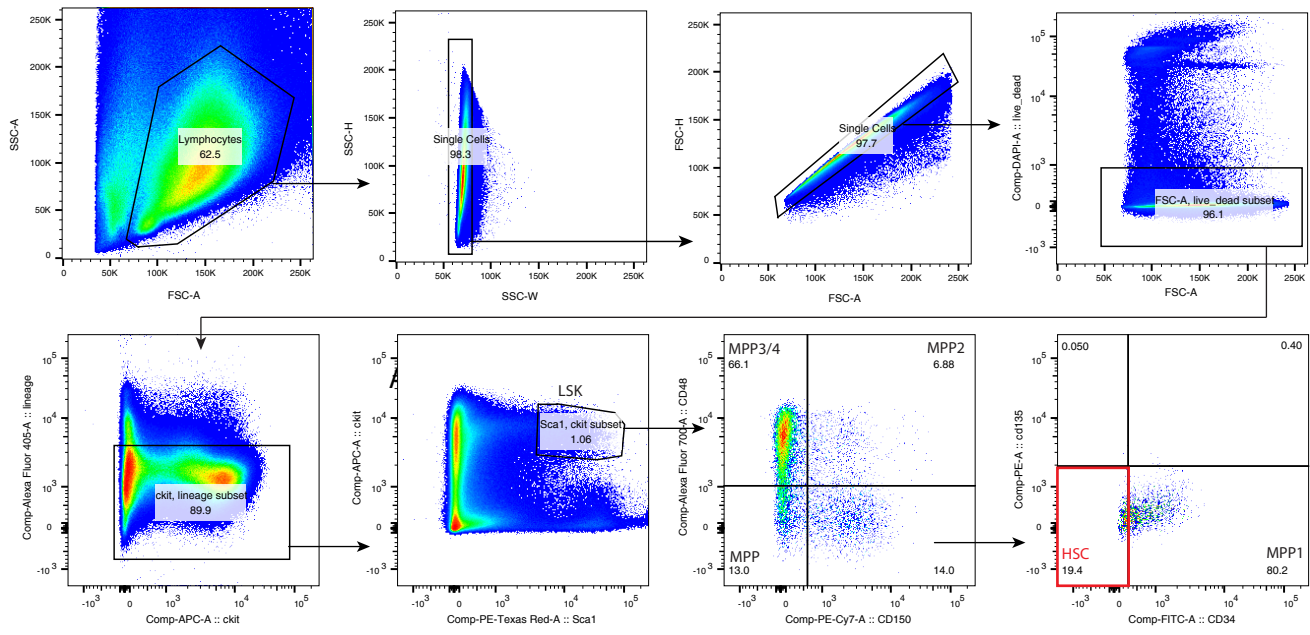

B

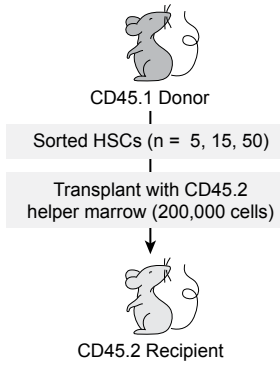

C

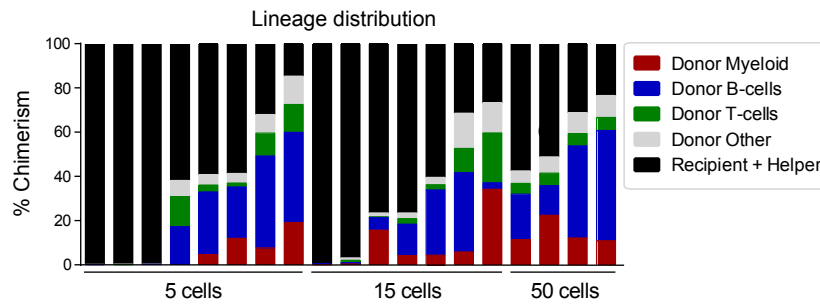

D

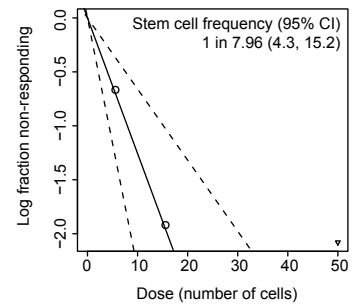

E

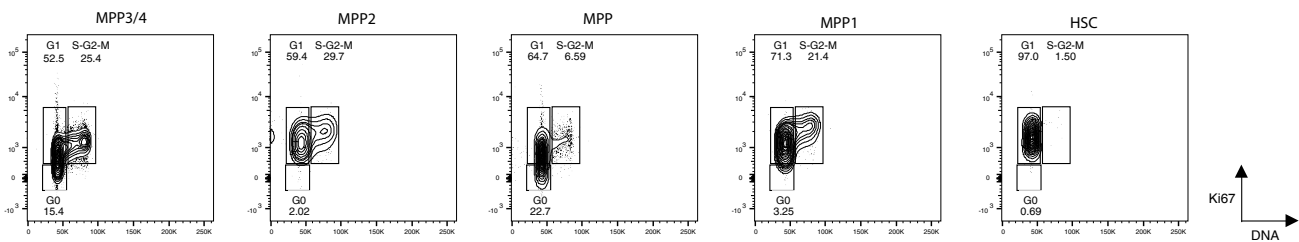

F

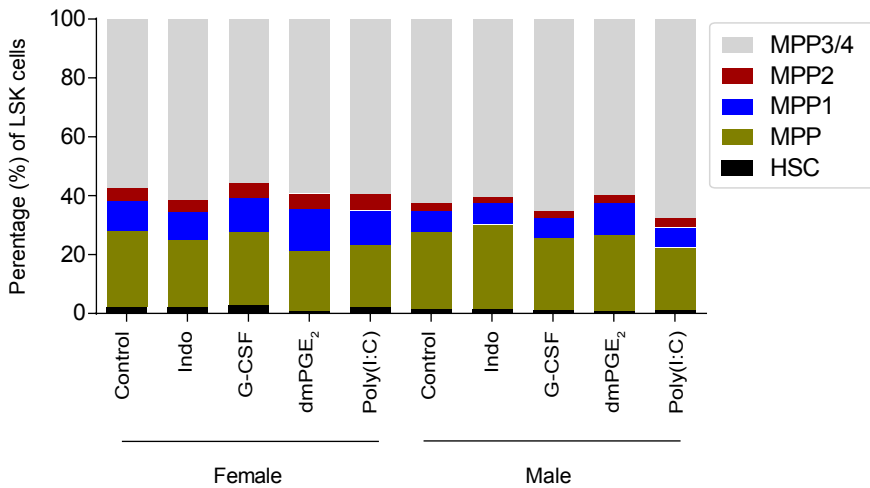

G

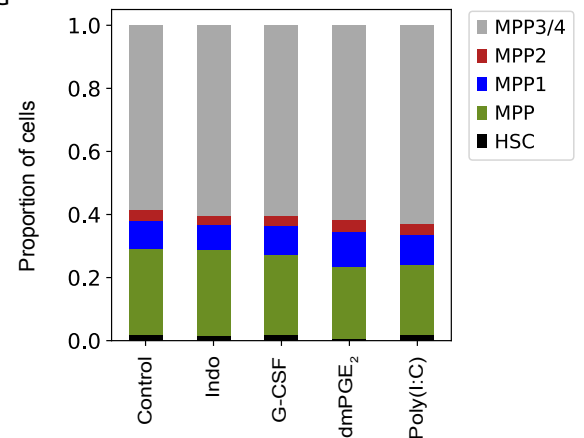

Supplementary Figure 2: Validation of single cell RNA-Seq clustering with independent replicates, pathway enrichment and candidate genes

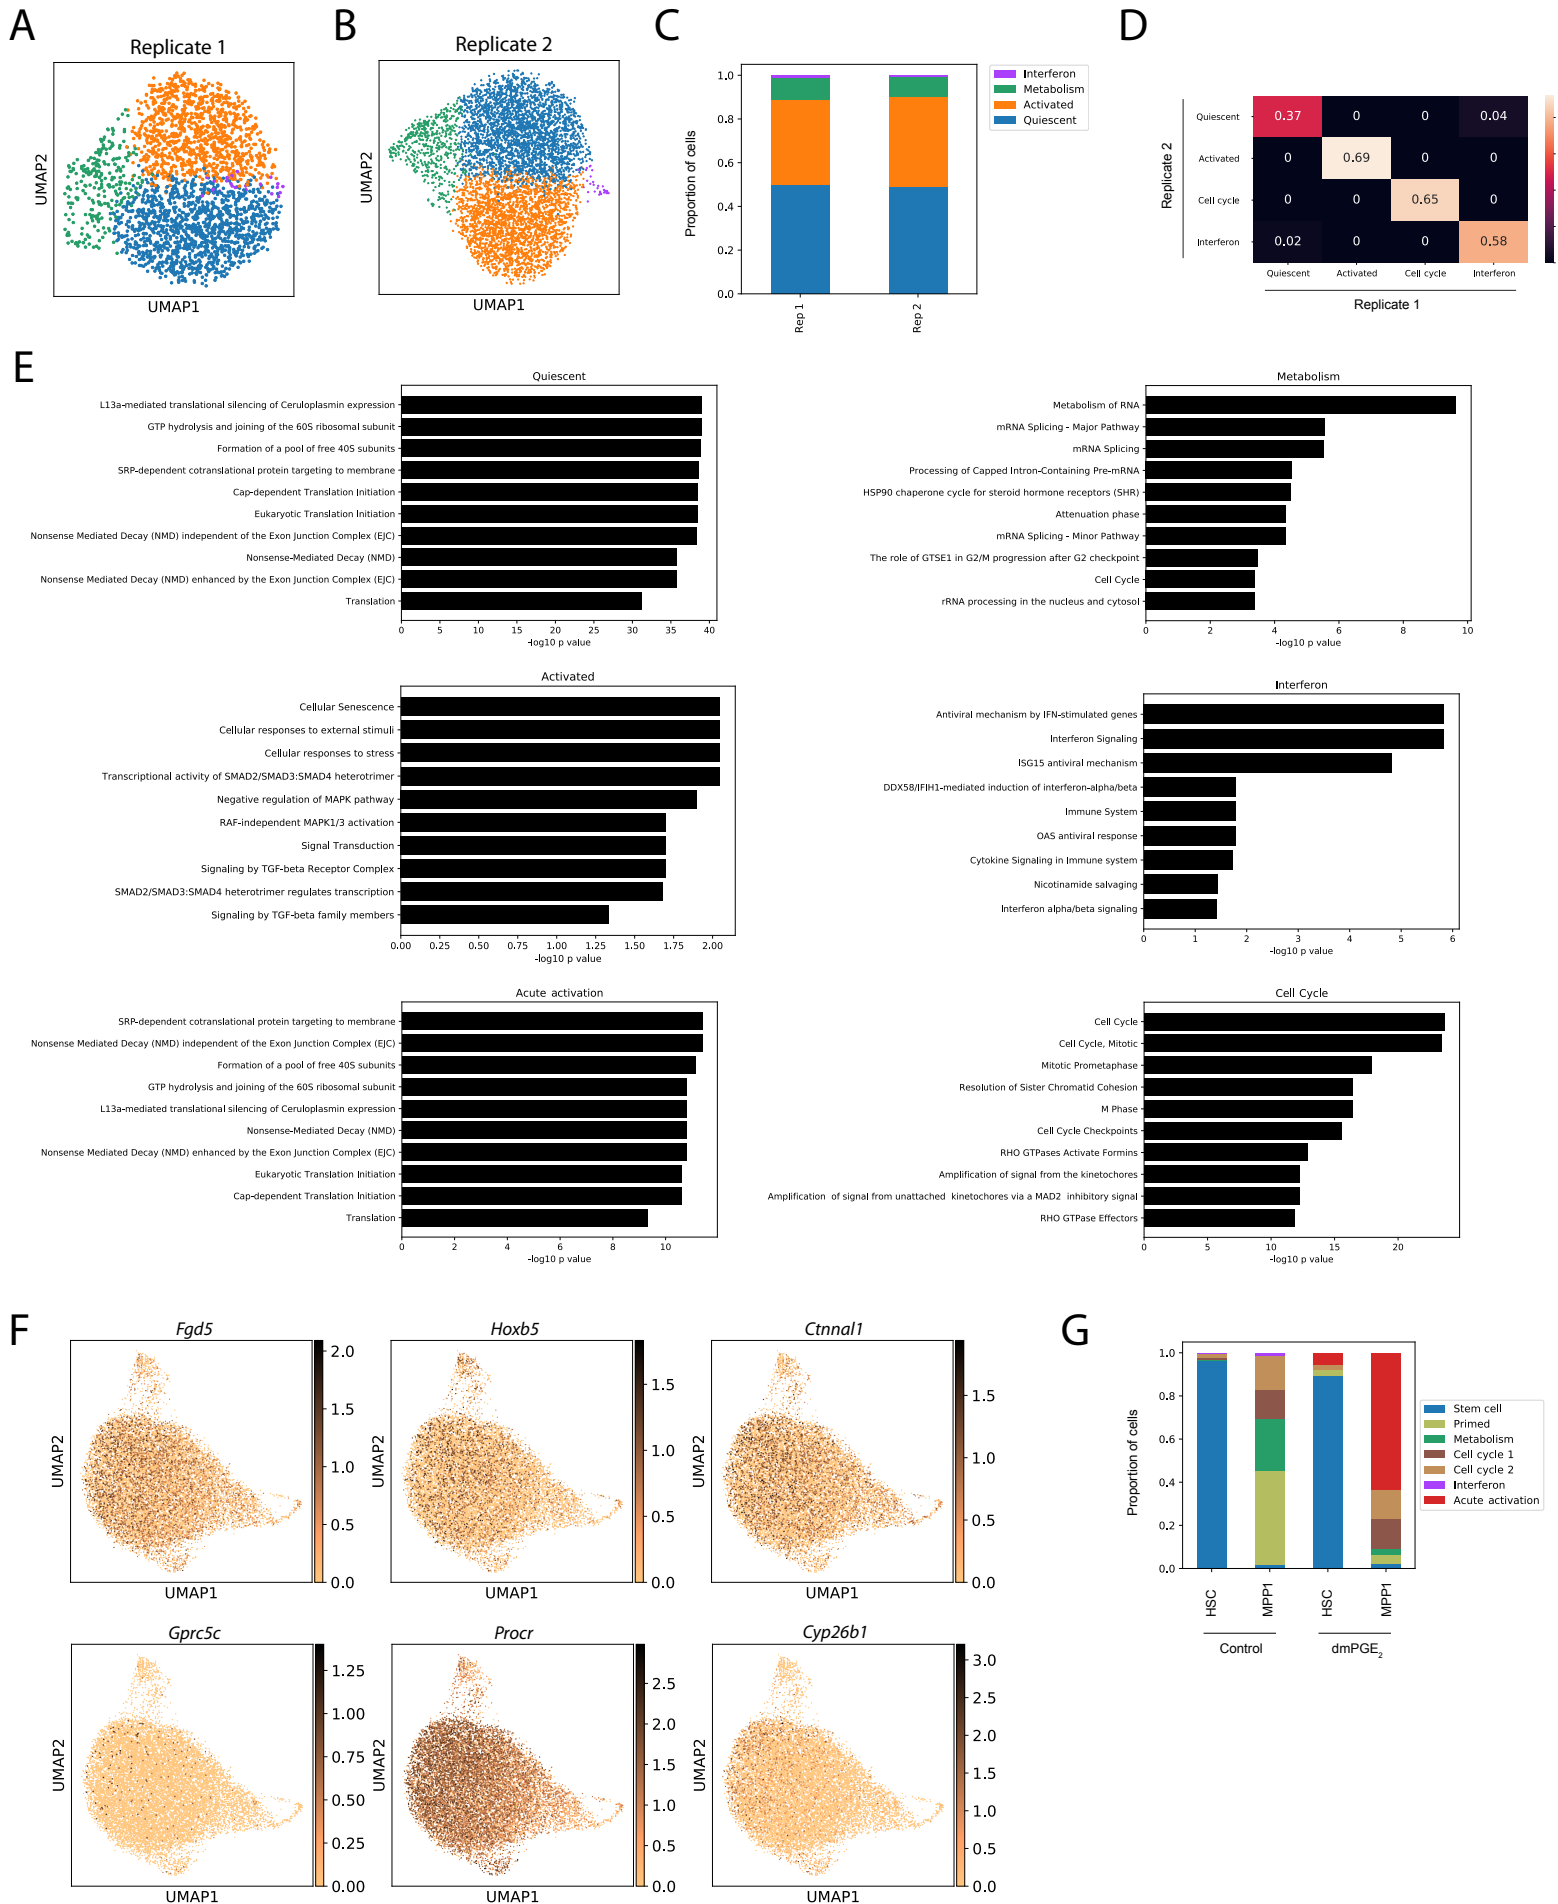



Supplementary Figure 3: Little sexual dimorphism in HSCs in steady state and upon stimulation

A

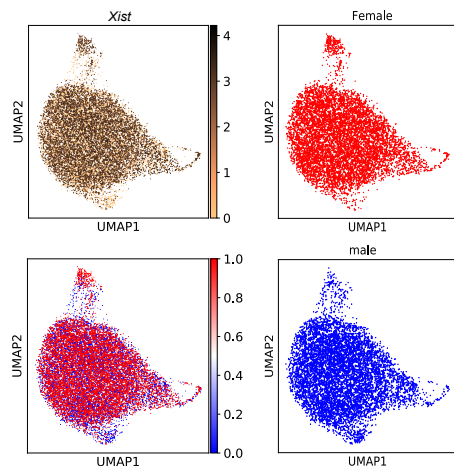

B

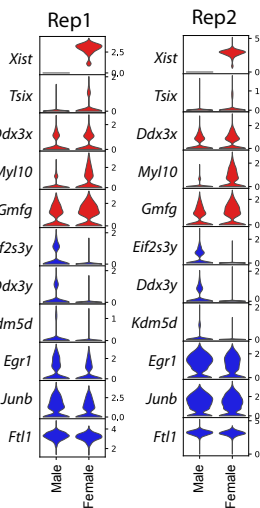

C

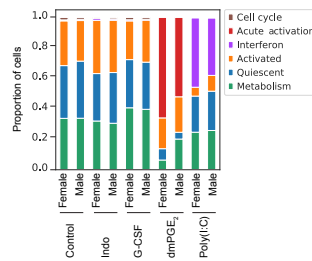

D

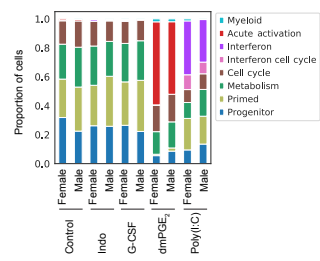

E

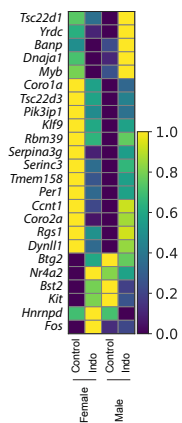

F

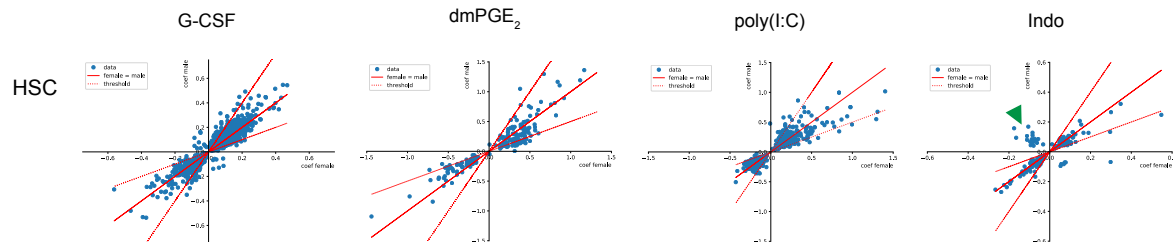

G

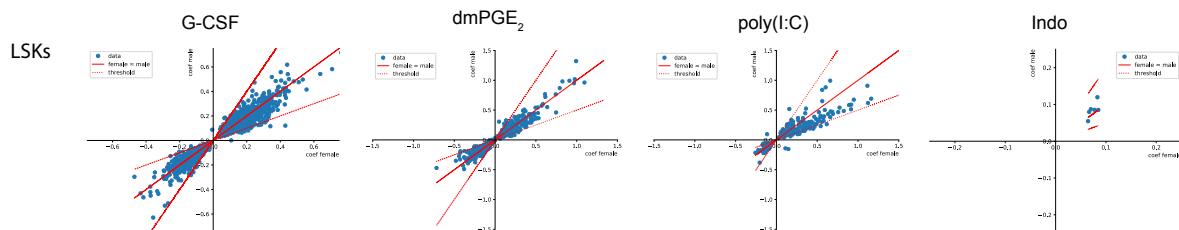

Supplemental Figure 4: Gene expression in LSKs enables evaluation of specificity of niche stimulation in different cell populations

A

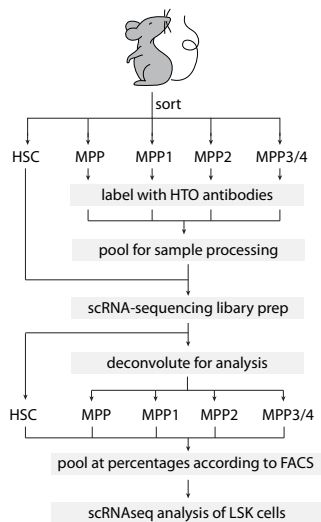

B

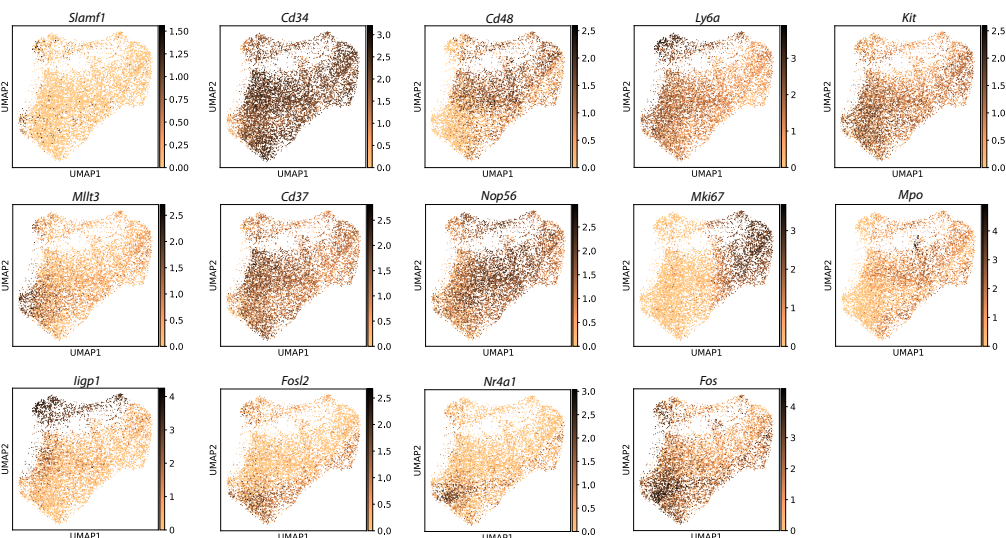

C

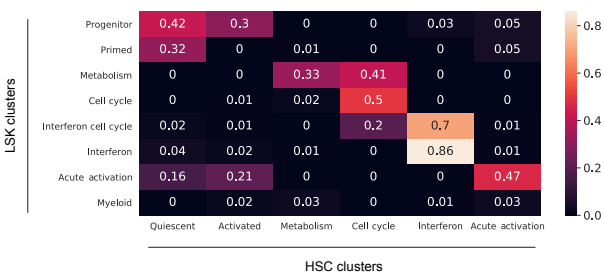

D

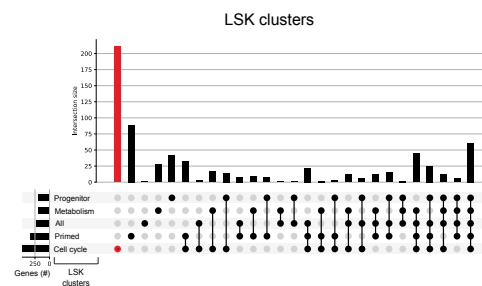

E

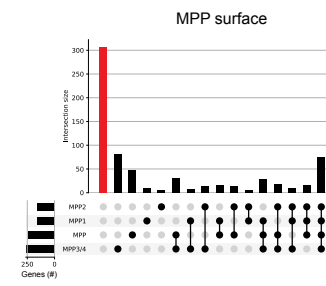

F

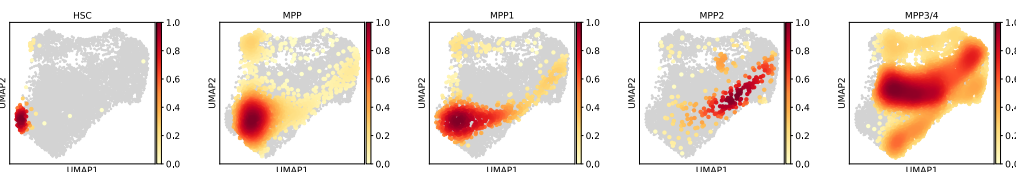

G

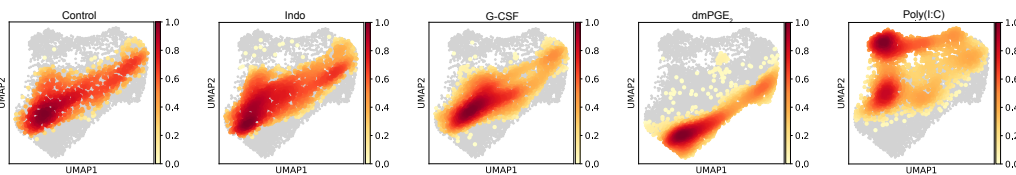

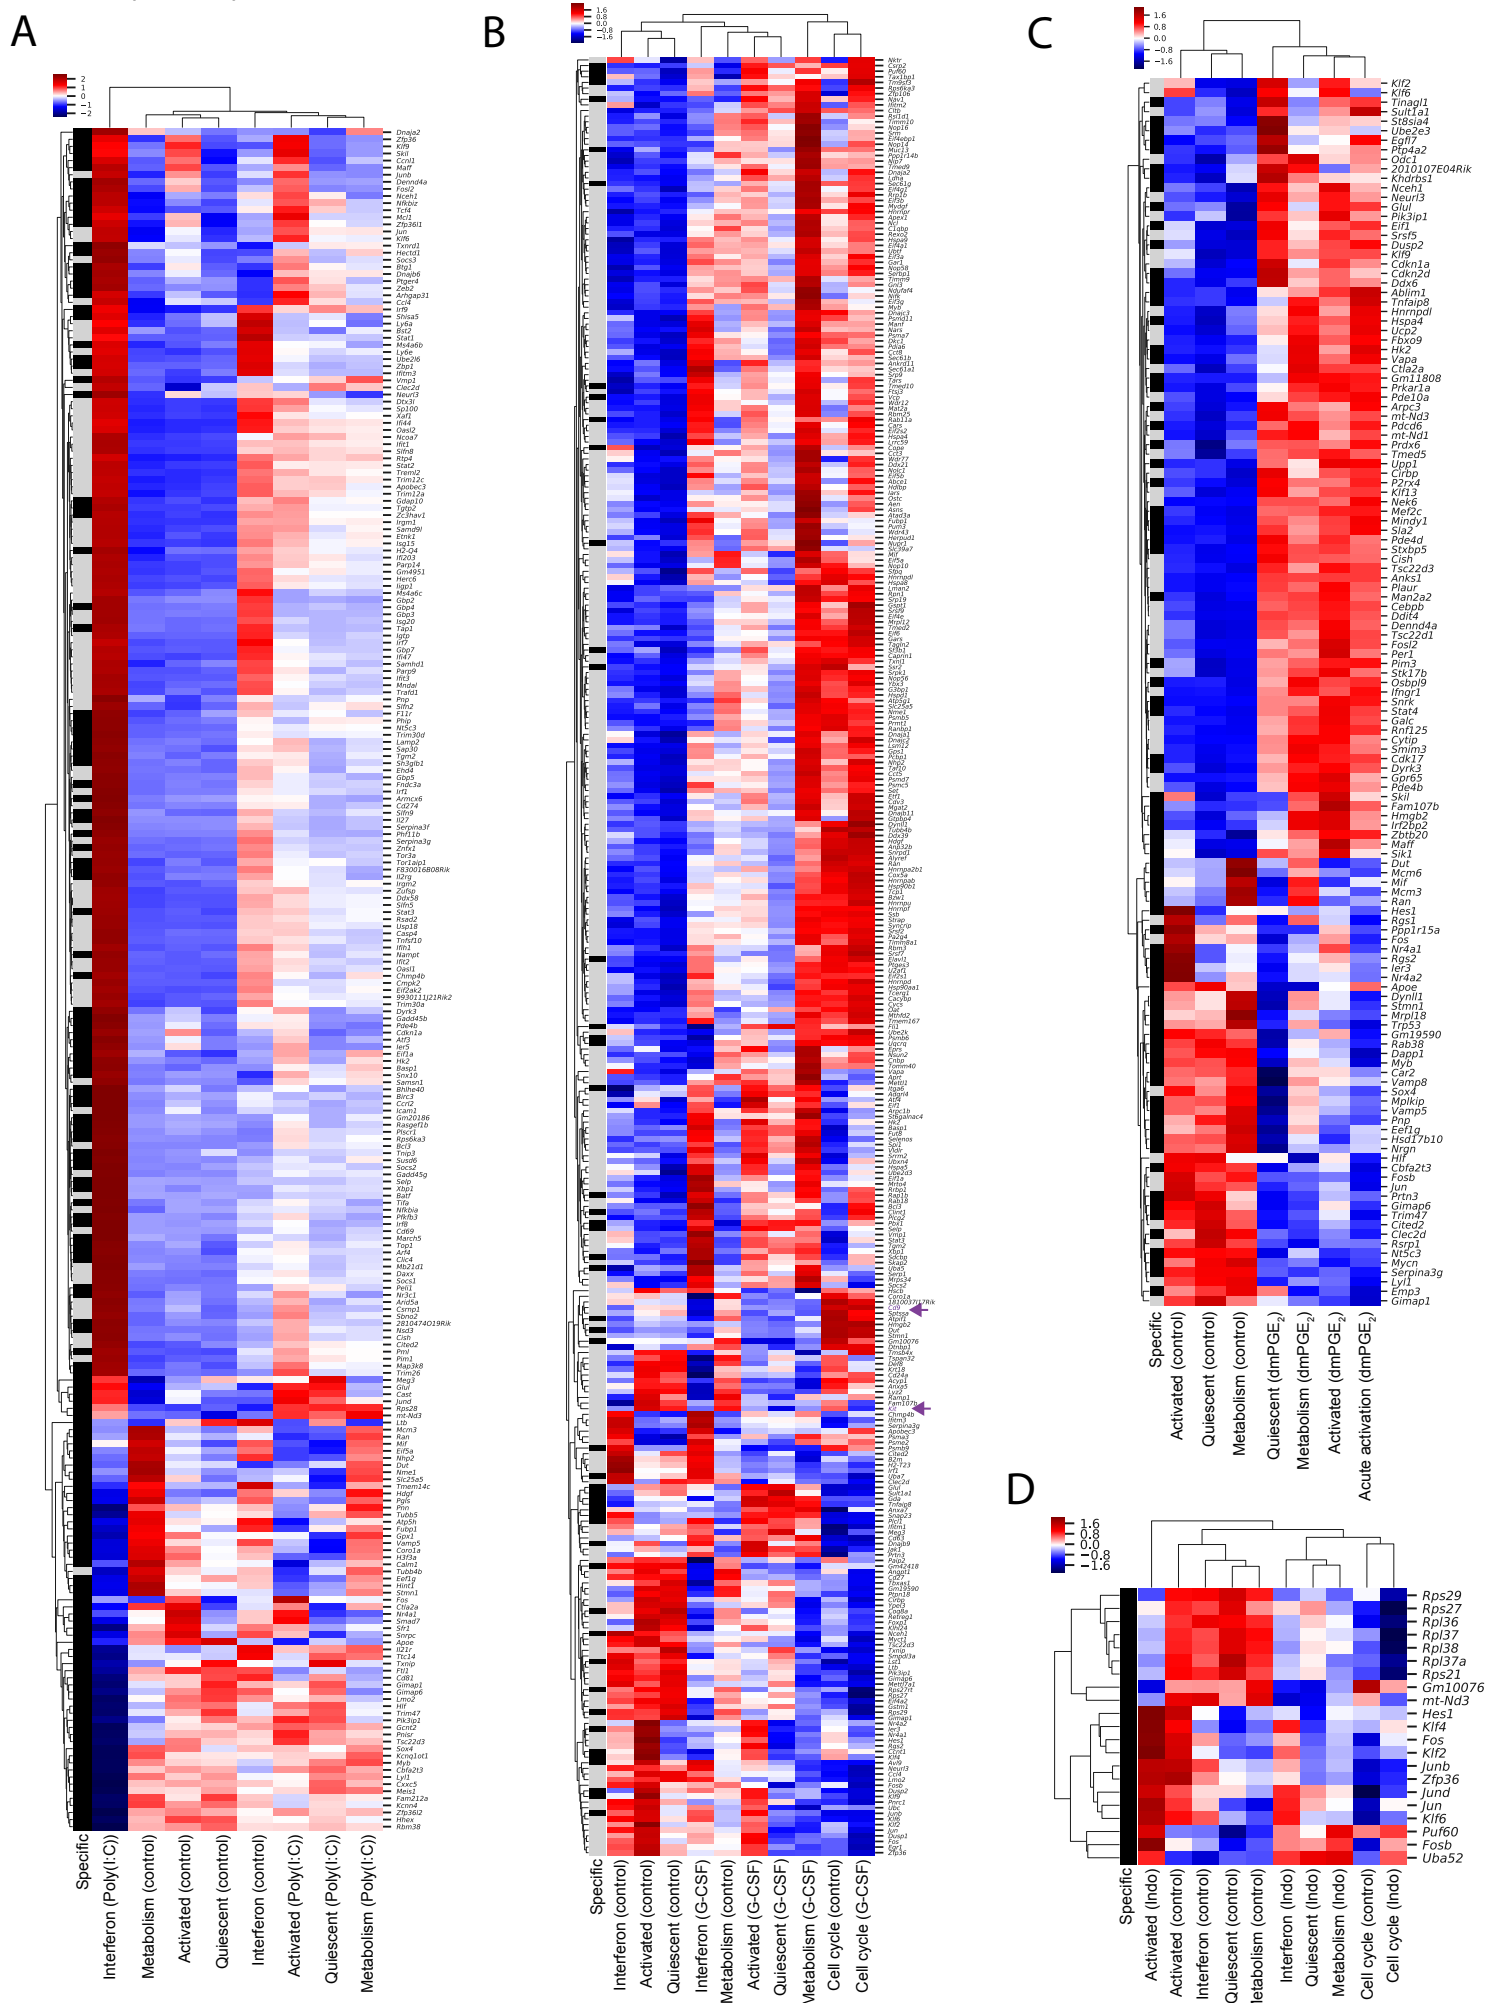

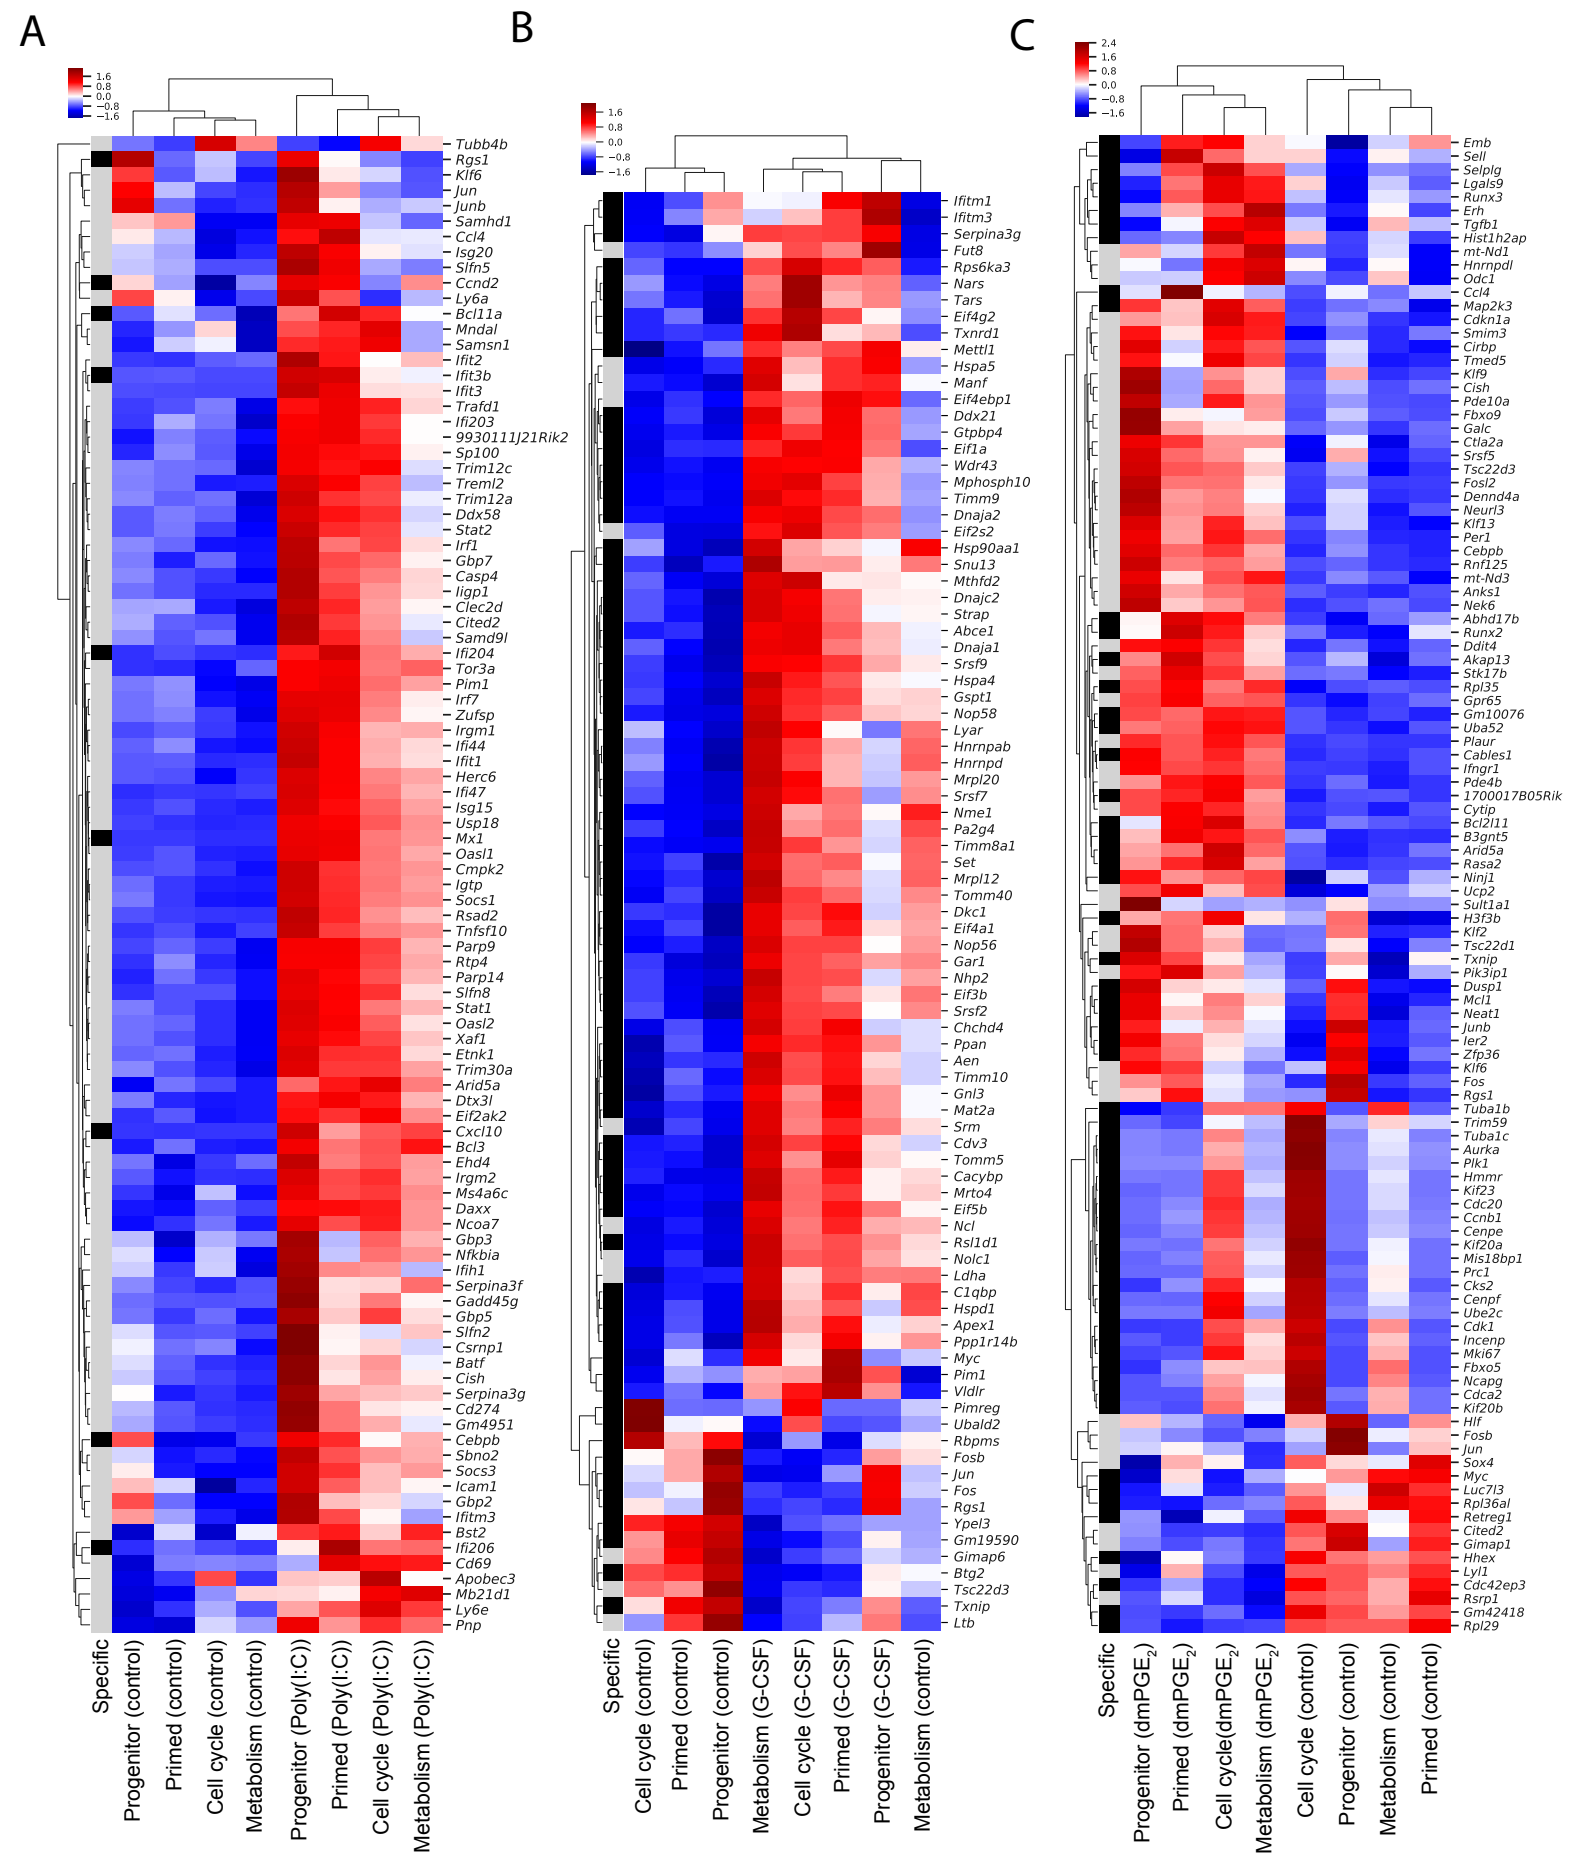

# Supplemental Figure 7: Indomethacin affects transcriptional state of IEGs

**A**

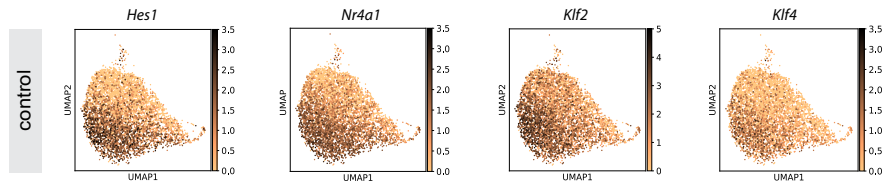

**B**

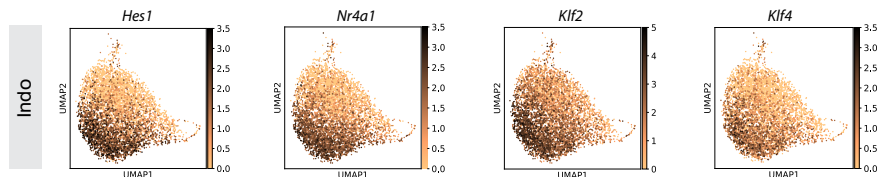

**C**

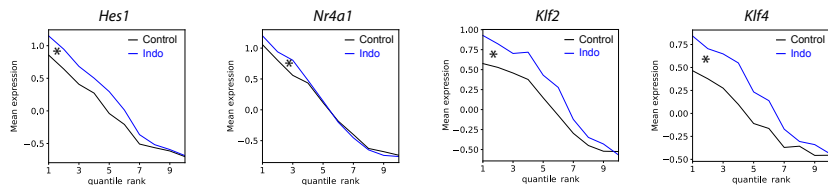

**D**

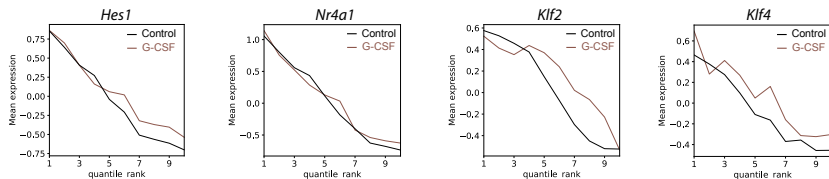

Supplementary Figure 8: Uniform distribution of motif activity immediately downstream of niche stimulants and differential enrichment for secondary signals in HSCs and LSKs.

A

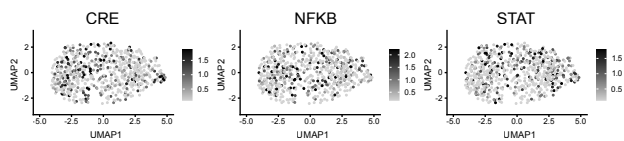

C

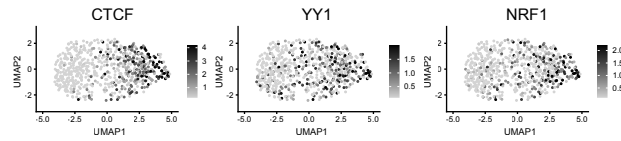

B

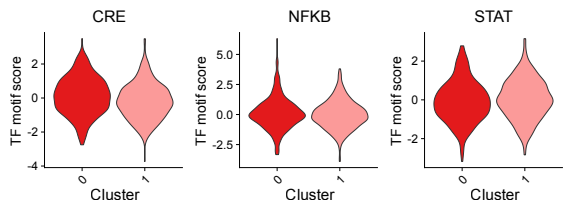

D

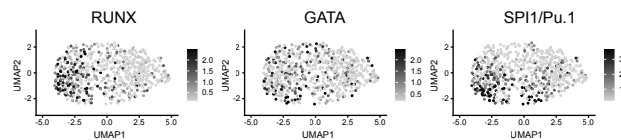

E

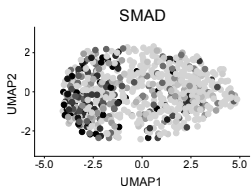

G

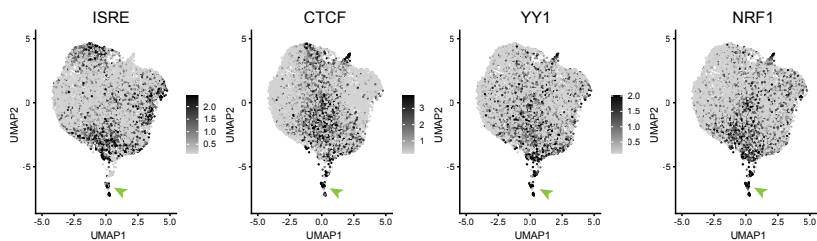

F

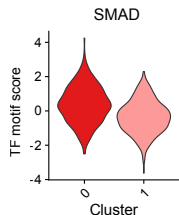

H

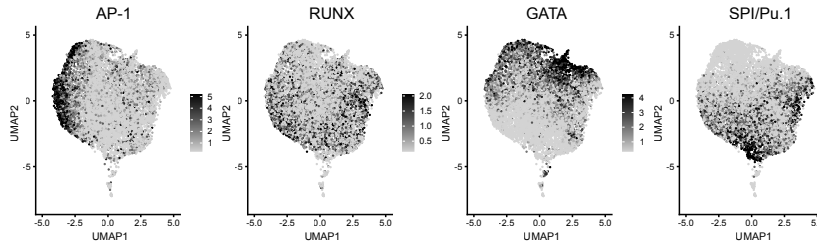

Source: https://biorxiv.org/content/10.1101/2021.03.09.430613v1.full.pdf
